# Supplementary material for: Sustainable and Safe N-alkylation of N-heterocycles by Propylene Carbonate under Neat Reaction Conditions
Source: MDPI journal article supplement (doi:10.3390/ijms25105523), 2024-05-18
Supplement: s1 [file s1]

# Sustainable and Safe *N*-alkylation of *N*-heterocycles by Propylene Carbonate under Neat Reaction Conditions

Andrea Czompa <sup>1</sup>, Dóra Bogdán <sup>1,2</sup>, Balázs Balogh <sup>1</sup>, Eszter Erdei <sup>1,2</sup>, Patrik Selymes <sup>1</sup>, Attila Csomos <sup>3,4</sup>  
and István M. Mándity <sup>1,2,\*</sup>

<sup>1</sup> Institute of Organic Chemistry, Semmelweis University, Hőgyes Endre utca 7, H-1092 Budapest, Hungary; czompa.andrea@semmelweis.hu (A.C.); bogdan.dora@semmelweis.hu (D.B.); balogh.balazs@semmelweis.hu (B.B.); erdei.eszter@stud.semmelweis.hu (E.E.); patrik.selymes@gmail.com (P.S.)

<sup>2</sup> HUN-REN Artificial Transporters Research Group, Institute of Materials and Environmental Chemistry, Research Centre for Natural Sciences Magyar Tudósok körútja 2, H-1117 Budapest, Hungary

<sup>3</sup> Femtonics Ltd., Tüzoltó utca 59, H-1094 Budapest, Hungary; attila.csomos@femtonics.eu

<sup>4</sup> Hevesy György PhD School of Chemistry, Eötvös Loránd University, Pázmány Péter sétány 1/A, H-1117 Budapest, Hungary

\* Correspondence: mandity.istvan@ttk.hu; Tel.: +36-205-230-081

## Contents

|                                                                                        |           |
|----------------------------------------------------------------------------------------|-----------|
| <b>Experimental section</b>                                                            | <b>3</b>  |
| <b>HPLC-MS data, <sup>1</sup>H- and <sup>13</sup>C-NMR spectrum</b>                    |           |
| <b>2-(2-hydroxypropyl)-1<i>H</i>-isoindole-1,3(2<i>H</i>)-dione (8)</b>                | <b>10</b> |
| <b>1-(2-hydroxypropyl)-1<i>H</i>-indole-2,3-dione (9)</b>                              | <b>11</b> |
| <b>2-(2-hydroxypropyl)phthalazin-1(2<i>H</i>)-one (10)</b>                             | <b>13</b> |
| <b>3-(2-hydroxypropyl)pyrimidin-4(3<i>H</i>)-one (11)</b>                              | <b>14</b> |
| <b>1-(2-hydroxypropyl)pyrimidin-4(1<i>H</i>)-one (12)</b>                              | <b>16</b> |
| <b>1,3-bis(2-hydroxypropyl)-6-methylpyrimidine-2,4(1<i>H</i>,3<i>H</i>)-dione (13)</b> | <b>17</b> |
| <b>2-(2-hydroxypropyl)benzotriazole (14)</b>                                           | <b>19</b> |
| <b>1-(2-hydroxypropyl) benzotriazole (15)</b>                                          | <b>20</b> |
| <b>1-(2-hydroxypropyl)pyrimidine-2,4(1<i>H</i>,3<i>H</i>)-dione (16)</b>               | <b>22</b> |
| <b>1,3-bis(2-hydroxypropyl)pyrimidine-2,4(1<i>H</i>,3<i>H</i>)-dione (17)</b>          | <b>23</b> |
| <b>2-methyl-2,3-dihydro-[1,3]oxazolo[3,2-<i>a</i>]pyrimidin-7-one (18)</b>             | <b>25</b> |
| <b>2-methyl-2,3-dihydro-[1,3]thiazolo[3,2-<i>a</i>] pyrimidin-7-one (19)</b>           | <b>26</b> |
| <b>Theoretical calculations</b>                                                        | <b>28</b> |
| <b>Discussion</b>                                                                      | <b>30</b> |

## Experimental section

Phthalimide (99%) and propylene carbonate (99%) were purchased from Alfa Aesar. 1(2*H*)-Phthalazinone (99%), 4(3*H*)-pyrimidone (98%), 2,4-dihydroxy-6-methylpyrimidine (97%) and propylene carbonate (99.7%) were purchased from Sigma-Aldrich. Isatin (98%) was purchased from Reanal, 1*H*-benzotriazole (99%) from Merck, 2-thiouracil (98%) from Fluka, while sodium carbonate (99.5%) was purchased from Acidum and calcium chloride (98.1%) from Molar.

Thin-layer chromatography (TLC) was performed on aluminium sheets precoated with Merck 5735 Kieselgel 60F254. Column chromatography was carried out either with Merck 5735 Kieselgel 60F (0.040–0.063 mm mesh). All other chemicals and solvents were purchased from different commercial sources and used as received without further purification.

Freeze-drying was performed one night in a LYPH-Lock 1L lyophilizer LabConco (Kansas City, Missouri) with high vacuum pump, at 10 mmHg and –50 °C. Melting points were measured on a Büchi M-550 apparatus (Büchi Labortechnik AG, Switzerland) and are not corrected.

## NMR measurements

<sup>1</sup>H (400 MHz) and <sup>13</sup>C (100 MHz) NMR spectra were recorded at room temperature on Varian Mercury Plus spectrometer. Amounts of 10–15 mg of compounds were dissolved in 0.6 ml DMSO-*d*<sub>6</sub> or a mixture of DMSO-*d*<sub>6</sub> + D<sub>2</sub>O and transferred to 5 mm NMR sample tubes. Chemical shifts are given on the  $\delta$ -scale and referenced to the solvent (DMSO-*d*<sub>6</sub>:  $\delta_C$ =39.50 ppm and  $\delta_H$ =2.50 ppm). For <sup>1</sup>H NMR measurement 24 K data points, 2.0 s acquisition time and 6400 Hz sweep width were used. <sup>13</sup>C spectra were recorded with 62 K data points and 24000 Hz sweep width. For 2D measurements, in case of the gHSQC spectrum the sweep width in F2 was 3000 Hz; data points (t<sub>2</sub> × t<sub>1</sub>) were acquired with 1 K × 128, in case of the gHMBC spectrum the sweep width in F2 was 3000 Hz; data points (t<sub>2</sub> × t<sub>1</sub>) were acquired with 1 K × 256, respectively.

## HPLC-MS method used for the determination of product purity

The HPLC-MS system consisted of Shimadzu LC-40AD XR parallel pumps, with Shimadzu DGU-405 degasser unit, Shimadzu SIL-40C XR Autosampler, CTO-40S thermostat at 40 °C, and LCMS-2020 mass spectrometer, equipped with DUIS ionizer (Drying gas 15L/min, Nebulizing gas 1.5 L/min; the DL temp is 250 °C, ESI 10 000 V). The HPLC column was an Ascentis C-18 2  $\mu$ m, 2.1 × 5 mm. Eluent A was 0.1% TFA in water (from Merck); eluent B was 0.1% TFA in acetonitrile (from Merck). The gradient was set by a linear program, where eluent B was increased from 0% to 100% within 4.5 min (Table S1). The flow rate was 0.75 ml/min. The obtained retention times measured at 254 nm are specified at the corresponding compound.

**Table S1.** Gradient elution in HPLC-MS method

| Time (min.) | A(%) | B(%)  |
|-------------|------|-------|
| 0.0         | 95.0 | 5.0   |
| 0.5         | 0.0  | 100.0 |

A: water with 0.1% TFA; B: acetonitrile with 0.1% TFA.

## Procedures

### Method A: Reaction under oil-bath (with 99% PC and drying agent)

The substrate (4 mmol of **1**, **2**, **4**, **5**, **6** or **7**, except for **3**: 3 mmol), the solid Na<sub>2</sub>CO<sub>3</sub> (4 mmol in the case of **1**, **2**, **4**, **5**, **6** or **7**, except for **3**: 3 mmol), the drying agent CaCl<sub>2</sub> (4 mmol in the case of **1**, **2**, **4**, **5**, **6** or **7**, except for **3**: 3 mmol), 99 % propylene carbonate (36 mmol, 3 mL, d = 1.204 g/mL in the case of **1**, **2**, **3**, **4**, **6** or **7**, except for **5**: 48 mmol, 4 mL, d = 1.204 g/mL) was measured into a round-bottom flask with Liebig-condenser

and gas-outlet adapter and the suspension was treated at reflux temperature at a max. oil-bath temperature of 170 °C. After the different reaction time (Table S2, S3, S4, S5, S6, S7, S8), the suspension was cooled down and the unreacted solid filtered off. After washing with water, the mother liquid was neutralized with 10% HCl solution and the aqueous layer was extracted with CHCl<sub>3</sub> (3 × 25 mL, in the case of **2**, **5**), respectively EtOAc (3 × 25 mL, in the case of **1**, **3**, **4**, **6**, **7**). Usually, the organic phase contained the product (**10**, **11**, **12**, **16** and **17**), but in some cases, the extraction was satisfactory only to separate the unreacted propylene carbonate and propylene glycol from the raw product, which remained in the neutralized aqueous phase (product **8**, **9**, **13**, **14**, **15**, **18** and **19**). The collected organic phase was washed with 10% CuSO<sub>4</sub> solution (2 × 15 mL) and evaporated, after drying over Na<sub>2</sub>SO<sub>4</sub> and filtration. In each case, the crude product was lyophilized overnight at 10 mmHg and –50 °C and weighted, before the product was purified by column chromatography (silica gel, 0.040–0.063 mesh size, except product **10** obtained after treatment with hexane). The unsuccessful reactions are not described in details, but some are mentioned in Table S2 and S3. All pure products: **8**, **9**, **10**, **11**, **12**, **13**, **14**, **15**, **16**, **17**, **18** and **19** were characterized by <sup>1</sup>H-, <sup>13</sup>C-NMR spectroscopy and HPLC-MS.

### Method B: Reactions under MW conditions (with and without drying agent)

MW assisted experiments were carried out in a monomode CEM-Discover MW reactor, using the standard configuration as delivered, including proprietary software. The experiments were executed in 80 mL MW process vials, dynamic method with control of the temperature by infrared detection. Conditions: 5 min. ramp time, 150 °C temperature, different hold time, max. 200 Psi pressure and 300 W power. The amount of reagents was identical with that used in Method A, in spite of that the use of drying agent was not necessary when 99.7 % PC was the reagent and solvent too. After the corresponding reaction time (Table S2, S3, S4, S5, S6, S7, S8), the vial was cooled to 50 °C by air jet cooling, followed by usual work-up, described in Method A.

### 2-(2-hydroxypropyl)-1*H*-isoindole-1,3(2*H*)-dione (**8**)

**Table S2.** *N*-Alkylation of phthalimide (**1**)

| Entry | Heating  | PC (mmol/%) | Na <sub>2</sub> CO <sub>3</sub>           | T (°C) | Time (h) | Drying agent             | Yield (%)<br><b>8</b> |
|-------|----------|-------------|-------------------------------------------|--------|----------|--------------------------|-----------------------|
| 1     | oil bath | 36/99%      | 4 mmol                                    | 170    | 4        | 4 mmol CaCl <sub>2</sub> | 66                    |
| 2     |          | 24/99%      | 4 mmol 1M Na <sub>2</sub> CO <sub>3</sub> | 130    | 2        | none                     | –                     |
| 3     |          | 36/99%      |                                           |        |          | 400 mg MS (3 Å)          | 49                    |
| 4     | MW       | 36/99%      | 4 mmol                                    | 150    | 1        | 4 mmol CaCl <sub>2</sub> | 63                    |
| 5     |          | 36/99.7%    |                                           |        |          | none                     | 70                    |

**Table S2, entry 1:** The 730 mg crude product obtained after lyophilization of the organic phase (EtOAc) was treated with 2 × 5 ml hexane, filtered and dried until constant weight:

539 mg (66%) off-white solid **2-(2-hydroxypropyl)-1*H*-isoindole-1,3(2*H*)-dione (**8**)**, C<sub>11</sub>H<sub>11</sub>NO<sub>3</sub>: 205.21, CAS Reg. No: 3700-55-8, R<sub>f</sub> = 0.58 (CHCl<sub>3</sub>/EtOAc 1/1), Mp: 86.9-89.1 °C, rt = 4.78' (92%), m/z: 206.

<sup>1</sup>H NMR (400 MHz, DMSO-*d*<sub>6</sub>): δ = 1.07 (d, *J* = 6.3 Hz, 3H, CH<sub>3</sub>), 3.41 (dd, *J* = 13.6, 4.9 Hz, 1H, CH<sub>2</sub>), 3.53 (dd, *J* = 13.6, 8.1 Hz, 1H, CH<sub>2</sub>), 3.92 (m, 1H, CHOH), 7.90-7.80 (m, 4H, ArCH).

<sup>13</sup>C NMR (100 MHz, DMSO-*d*<sub>6</sub>): δ = 20.9, 45.3, 63.5, 122.9, 131.8, 134.3, 168.1.

**Table S2, entry 3:** The 580 mg crude product obtained after lyophilization of the organic phase (EtOAc) was treated with 2 × 5 ml hexane, filtered and dried until constant weight: 403 mg (49%).

**Table S2, entry 4:** The 810 mg crude product obtained after lyophilisation of the organic phase (EtOAc) was treated with 2 × 5 ml hexane, filtered and dried until constant weight: 516 mg (63%).

**Table S2, entry 5:** The 880 mg crude product obtained after lyophilisation of the organic phase (EtOAc) was treated with 2 × 5 ml hexane, filtered and dried until constant weight: 575 mg (70%).

## 1-(2-hydroxypropyl)-1*H*-indole-2,3-dione (**9**)

**Table S3.** *N*-Alkylation of isatin (**2**)

| Entry | Heating | PC (mmol/%) | Na <sub>2</sub> CO <sub>3</sub> | T (°C) | Time (h) | CaCl <sub>2</sub> | Yield (%)<br><b>9</b> |
|-------|---------|-------------|---------------------------------|--------|----------|-------------------|-----------------------|
| 1     | MW      | 36/99%      | 4 mmol                          | 160    | 1        | 4 mmol            | –                     |
| 2     |         | 36/99.7%    |                                 | 150    | 1        | none              | 77                    |

**Table S3, entry 2:** The 993 mg crude product obtained after lyophilization of the organic phase (CHCl<sub>3</sub>) was purified by column chromatography on 10 g silica gel (0.040–0.063 mesh size), with gradient elution: CHCl<sub>3</sub>, followed by CHCl<sub>3</sub>/EtOAc 2/1 and 1/1. The fractions containing the pure product were collected, evaporated and dried until constant weight:

634 mg (77%) red solid, C<sub>11</sub>H<sub>11</sub>NO<sub>3</sub>: 205.21, CAS Reg. No: 503855-32-1, R<sub>f</sub> = 0.33 (CHCl<sub>3</sub>/EtOAc 1/1), Mp: 66.5–68.3 °C, rt = 4.45' (95%), m/z = 206.

<sup>1</sup>H NMR (400 MHz, DMSO-*d*<sub>6</sub>): δ = 1.12 (d, *J* = 6.3 Hz, 3H, CH<sub>3</sub>), 3.64–3.51 (m, 2H, CH<sub>2</sub>), 3.96 (m, 1H, CHOH), 4.92 (d, *J* = 4.3 Hz, 1H, OH), 7.11 (t, *J* = 7.8 Hz, 1H, H-5), 7.21 (d, *J* = 7.8 Hz, 1H, H-7), 7.53 (d, *J* = 7.8 Hz, 1H, H-4), 7.64 (t, *J* = 7.8 Hz, 1H, H-6).

<sup>13</sup>C NMR (100 MHz, DMSO-*d*<sub>6</sub>): δ = 20.7, 47.4, 63.5, 111.4, 117.5, 122.9, 124.1, 137.9, 151.5, 158.4, 183.7.

## 2-(2-hydroxypropyl)phthalazin-1(2*H*)-one (**10**)

**Table S4.** *N*-Alkylation of phthalazin-1(2*H*)-one (**3**)

| Entry | Heating  | PC (mmol/%) | Na <sub>2</sub> CO <sub>3</sub> | T (°C) | Time (h) | CaCl <sub>2</sub> | Yield (%)<br><b>10</b> |
|-------|----------|-------------|---------------------------------|--------|----------|-------------------|------------------------|
| 1     | oil bath | 36/99%      | 3 mmol                          | 170    | 4        | 3 mmol            | 28                     |
| 2     | MW       | 36/99%      |                                 | 150    | 4        | 3 mmol            | 50                     |
| 3     |          | 36/99.7%    |                                 | 150    | 2        | none              | 55                     |

**Table S4, entry 1:** The 620 mg crude product obtained after lyophilization of the organic phase (EtOAc) was purified by column chromatography on 10 g silica gel (0.040–0.063 mesh size), with gradient elution: CHCl<sub>3</sub>, followed by CHCl<sub>3</sub>/EtOAc 1/1. The fractions containing the pure product were collected, evaporated and dried until constant weight:

170 mg (28%) brownish oil **2-(2-hydroxypropyl)phthalazin-1(2*H*)-one (10)**, C<sub>11</sub>H<sub>12</sub>N<sub>2</sub>O<sub>2</sub>: 204.23, CAS Reg. No: 1250877-71-4, R<sub>f</sub> = 0.38 (CHCl<sub>3</sub>/EtOAc 1/1), rt = 2.85' (95%), m/z = 205.

<sup>1</sup>H NMR (400 MHz, DMSO-*d*<sub>6</sub>): δ = 1.09 (d, *J* = 5.9 Hz, 3H, CH<sub>3</sub>), 3.97 (m, 1H, CH<sub>2</sub>), 4.20–4.05 (m, 2H, CH<sub>2</sub> and CHOH), 4.81 (d, *J* = 4.7 Hz, 1H, OH), 7.85 (m, 1H, H-7), 7.97–7.89 (m, 2H, H-5 and H-6), 8.25 (d, *J* = 7.8 Hz, 1H, H-8), 8.41 (s, 1H, NCH).

<sup>13</sup>C NMR (100 MHz, DMSO-*d*<sub>6</sub>): δ = 21.0, 57.5, 64.1, 125.8, 126.7, 127.2, 129.3, 131.9, 133.4, 137.6, 158.7.

**Table S4, entry 2:** The 603 mg crude product obtained after lyophilization of the organic phase (EtOAc) was purified by column chromatography on 10 g silica gel (0.040–0.063 mesh size), with gradient elution: CHCl<sub>3</sub>, followed by CHCl<sub>3</sub>/EtOAc 1/1. The fractions containing the pure product were collected, evaporated and dried until constant weight: 309 mg (50%).

**Table S4, entry 3:** The 844 mg crude product obtained after lyophilization of the organic phase (EtOAc) was purified by column chromatography on 10 g silica gel (0.040–0.063 mesh size), with gradient elution: CHCl<sub>3</sub>, followed by CHCl<sub>3</sub>/EtOAc 1/1. The fractions containing the pure product were collected, evaporated and dried until constant weight: 336 mg (55%).

### 3-(2-hydroxypropyl)pyrimidin-4(3H)-one (11) and 1-(2-hydroxypropyl)pyrimidin-4(1H)-one (12)

**Table S5.** *N*-Alkylation of pyrimidin-4(3H)-one (4)

| Entry | Heating  | PC (mmol/%) | Na <sub>2</sub> CO <sub>3</sub> | T (°C) | Time (h) | CaCl <sub>2</sub> | Yield (%)<br><b>11, 12</b> |
|-------|----------|-------------|---------------------------------|--------|----------|-------------------|----------------------------|
| 1     | oil bath | 36/99%      | 4 mmol                          | 170    | 3        | 4 mmol            | 28, 54                     |
| 2     | MW       | 36/99.7%    |                                 | 150    | 1        | none              | 42, 57                     |

**Table S5, entry 1:** The 1.20 g crude product obtained after lyophilization of the aqueous phase was purified by column chromatography on 10 g silica gel (0.040–0.063 mesh size), with gradient elution: Toluene/MeOH 4/1, 2/1 and 1/1. The fractions containing the pure products were collected, evaporated and dried until constant weight:

174 mg (28%) yellow oil **3-(2-hydroxypropyl)pyrimidin-4(3H)-one (11)**, C<sub>7</sub>H<sub>10</sub>N<sub>2</sub>O<sub>2</sub>: 154.17, CAS Reg. No: 1405334-56-6, R<sub>f</sub> = 0.63 (Toluene/MeOH 1/1), rt = 0.21' (100%), m/z = 155.

<sup>1</sup>H NMR (400 MHz, DMSO-*d*<sub>6</sub>): δ = 1.08 (d, *J* = 6.3 Hz, 3H, CH<sub>3</sub>), 3.56 (dd, *J* = 13.2, 8.5 Hz, 1H, CH<sub>2</sub>), 3.85 (m, 1H, CH<sub>2</sub>OH), 4.00 (dd, *J* = 13.2, 3.1 Hz, 1H, CH<sub>2</sub>), 5.00 (brs, 1H, OH), 6.38 (d, *J* = 6.6 Hz, 1H, HCC=O), 7.89 (d, *J* = 6.6 Hz, 1H, NCH), 8.29 (s, 1H, NCHN).

<sup>13</sup>C NMR (100 MHz, DMSO-*d*<sub>6</sub>): δ = 21.0, 52.9, 63.3, 114.8, 153.3, 153.6, 160.4.

335 mg (54%) yellow amorph solid **1-(2-hydroxypropyl)pyrimidin-4(1H)-one (12)**, C<sub>7</sub>H<sub>10</sub>N<sub>2</sub>O<sub>2</sub>: 154.17, R<sub>f</sub> = 0.38 (Toluene/MeOH 1/1), Mp > 270 °C (decomp.), rt = 0.56' (97%), m/z = 155 and 331 [2M + Na].

<sup>1</sup>H NMR (400 MHz, DMSO-*d*<sub>6</sub>): δ = 1.05 (d, *J* = 6.2 Hz, 3H, CH<sub>3</sub>), 3.64 (dd, *J* = 13.8, 8.0 Hz, 1H, CH<sub>2</sub>), 3.82 (m, 1H, CH<sub>2</sub>OH), 3.90 (m, 1H, CH<sub>2</sub>), 6.08 (d, *J* = 7.6 Hz, 1H, O=CCH), 7.73 (dd, *J* = 7.6, 2.5 Hz, 1H, NCH), 8.23 (d, *J* = 2.5 Hz, 1H, NCHN).

<sup>13</sup>C NMR (100 MHz, DMSO-*d*<sub>6</sub>): δ = 20.7, 60.0, 65.9, 111.4, 144.9, 154.3, 171.3.

**Table S5, entry 2:** The 800 g crude product obtained after lyophilization of the aqueous phase was purified by column chromatography on 10 g silica gel (0.040–0.063 mesh size), with gradient elution: Toluene, followed by Toluene/MeOH 2/1 and 1/1. The fractions containing the pure products were collected, evaporated and dried until constant weight: 260 mg (42%) product **11** and 350 mg (57%) product **12**.

### 1,3-bis(2-hydroxypropyl)-6-methylpyrimidine-2,4(1H,3H)-dione (13)

**Table S6.** Results with 6-methylpyrimidine-2,4(1H,3H)-dione (5)

| Entry | Heating | PC (mmol/%) | Na <sub>2</sub> CO <sub>3</sub> | T (°C) | Time (h) | CaCl <sub>2</sub> | Yield (%)<br><b>13</b> |
|-------|---------|-------------|---------------------------------|--------|----------|-------------------|------------------------|
| 1     | MW      | 36/99%      | 4 mmol                          | 150    | 6        | 4 mmol            | 12                     |
| 2     |         | 36/99.7%    |                                 |        | 2        | none              | 22                     |
| 3     |         | 36/99.7%    |                                 |        | 6        | none              | 49                     |

**Table S6, entry 1:** The 1.13 g crude product obtained after lyophilization of the aqueous phase was purified by column chromatography on 10 g silica gel (0.040–0.063 mesh size), with gradient elution: Toluene, followed by Toluene/MeOH 5/1, 2/1 and 1/1. The fractions containing the pure product were collected, evaporated,

and dried until constant weight:

124 mg (12%) white solid **1,3-bis(2-hydroxypropyl)-6-methylpyrimidine-2,4(1H,3H)-dione (13)**, C<sub>11</sub>H<sub>18</sub>N<sub>2</sub>O<sub>4</sub>: 242.27, CAS Reg. No: 2305764-32-1, R<sub>f</sub> = 0.63 (CHCl<sub>3</sub>/MeOH 5/1), Mp: 139.2–141.6 °C, rt = 3.62' (100%), m/z = 243.

<sup>1</sup>H NMR (400 MHz, DMSO-*d*<sub>6</sub>): δ = 0.99 (d, *J* = 5.6 Hz, 3H, N<sup>3</sup>CH<sub>2</sub>CHCH<sub>3</sub>), 1.08 (d, *J* = 6.3 Hz, 3H, N<sup>1</sup>CH<sub>2</sub>CHCH<sub>3</sub>), 2.28 (s, 3H, C<sup>6</sup>CH<sub>3</sub>), 3.52 (m, 1H, N<sup>1</sup>CH<sub>2</sub>), 3.65 (m, 1H, N<sup>3</sup>CH<sub>2</sub>), 3.77 (m, 1H, N<sup>1</sup>CH<sub>2</sub>), 3.82

(m, 1H, N<sup>3</sup>CH<sub>2</sub>), 3.95-3.85 (m, 2H, N<sup>1</sup>CH<sub>2</sub>CH and N<sup>3</sup>CH<sub>2</sub>CH), 4.64 (t, *J* = 5.4Hz, 1H, N<sup>3</sup>CH<sub>2</sub>CHOH), 4.97 (t, *J* = 4.2Hz, 1H, N<sup>1</sup>CH<sub>2</sub>CHOH), 5.57 (s, 1H, H-5).

<sup>13</sup>C NMR (100 MHz, DMSO-*d*<sub>6</sub>): δ = 20.1, 21.0, 21.2, 47.2, 51.7, 63.4, 64.0, 100.1, 152.0, 153.7, 161.8.

**Table S6, entry 2:** The 863 mg crude product obtained after lyophilization of the aqueous phase was purified by column chromatography on 10 g silica gel (0.040–0.063 mesh size), with gradient elution: Toluene, followed by Toluene/MeOH 5/1, 2/1 and 1/1. The fractions containing the pure product were collected, evaporated and dried until constant weight: 215 mg (22%).

**Table S6, entry 3:** The 962 g crude product obtained after lyophilization of the aqueous phase was purified by column chromatography on 10 g silica gel (0.040–0.063 mesh size), with gradient elution: Toluene, followed by Toluene/MeOH 5/1, 2/1 and 1/1. The fractions containing the pure product were collected, evaporated and dried until constant weight: 476 mg (49%).

## 2-(2-hydroxypropyl)benzotriazole (14) and 1-(2-hydroxypropyl) benzotriazole (15)

**Table S7.** *N*-Alkylation of 1*H*-benzotriazole (6)

| Entry | Heating  | PC (mmol/%) | Na <sub>2</sub> CO <sub>3</sub> | T (°C) | Time (h) | CaCl <sub>2</sub> | Yield (%)<br><b>14, 15</b> |
|-------|----------|-------------|---------------------------------|--------|----------|-------------------|----------------------------|
| 1     | oil bath | 36/99%      |                                 | 170    | 3        | 4 mmol            | 22, 47                     |
| 2     | MW       | 36/99%      | 4 mmol                          | 150    | 3        | 4 mmol            | 25, 53                     |
| 3     |          | 36/99.7%    |                                 | 150    | 4        | none              | 35, 55                     |

**Table S7, entry 1:** The 675 mg crude product obtained after lyophilization of the organic phase (EtOAc) was purified by column chromatography on 10 g silica gel (0.040–0.063 mesh size), with gradient elution: Toluene/EtOAc 2/1 and 1/1. The fractions containing the pure products were collected, evaporated and dried until constant weight:

154 mg (22%) brownish oil **2-(2-hydroxypropyl)benzotriazole (14)**, C<sub>9</sub>H<sub>11</sub>N<sub>3</sub>O: 177.21, CAS Reg. No: 90887-06-2, R<sub>f</sub> = 0.60 (Toluene/EtOAc 1/1), rt = 2.99' (95%), m/z = 178.

<sup>1</sup>H NMR (400 MHz, DMSO-*d*<sub>6</sub>): δ = 1.15 (d, *J* = 6.3Hz, 3H, CH<sub>3</sub>), 4.32 (m, 1H, CHOH), 4.69-4.60 (m, 2H, CH<sub>2</sub>), 5.06 (d, *J* = 4.8Hz, 1H, OH), 7.42 (m, 2H, H-4 and H-7), 7.91 (m, 2H, H-5 and H-6).

<sup>13</sup>C NMR (100 MHz, DMSO-*d*<sub>6</sub>): δ = 21.0, 63.1, 65.7, 117.8, 126.2, 143.7.

332 mg (47%) yellow oil **1-(2-hydroxypropyl) benzotriazole (15)**, C<sub>9</sub>H<sub>11</sub>N<sub>3</sub>O: 177.21, CAS Reg. No: 82131-97-3 [9, 10], R<sub>f</sub> = 0.43 (Toluene/EtOAc 1/1), rt = 0.22' (97%), m/z = 178.

<sup>1</sup>H NMR (400 MHz, DMSO-*d*<sub>6</sub>): δ = 1.13 (d, *J* = 6.3Hz, 3H, CH<sub>3</sub>), 4.14 (m, 1H, CHOH), 4.57 (dd, *J* = 14.2, 7.2Hz, 1H, CH<sub>2</sub>), 4.66 (dd, *J* = 14.2, 4.4Hz, 1H, CH<sub>2</sub>), 5.03 (d, *J* = 5.0Hz, 1H, OH), 7.38 (t, *J* = 7.8Hz, 1H, H-5), 7.52 (t, *J* = 7.8Hz, 1H, H-6), 7.87 (d, *J* = 7.8Hz, 1H, H-7), 8.02 (d, *J* = 7.8Hz, 1H, H-4).

<sup>13</sup>C NMR (100 MHz, DMSO-*d*<sub>6</sub>): δ = 20.9, 54.8, 65.6, 111.4, 118.9, 123.7, 126.9, 133.7, 145.1.

**Table S7, entry 2:** The 724 mg crude product obtained after lyophilization of the organic phase (EtOAc) was purified by column chromatography on 10 g silica gel (0.040–0.063 mesh size), with gradient elution: Toluene/EtOAc 2/1 and 1/1. The fractions containing the pure products were collected, evaporated and dried until constant weight: 177 mg (25%) product **14** and 376 mg (53%) product **15**.

**Table S7, entry 3:** The 790 mg crude product obtained after lyophilization of the organic phase (EtOAc) was purified by column chromatography on 10 g silica gel (0.040–0.063 mesh size), with gradient elution: Toluene/EtOAc 2/1 and 1/1. The fractions containing the pure products were collected, evaporated and dried until constant weight: 247 mg (35%) product **14** and 390 mg (55%) product **15**.

**1-(2-hydroxypropyl)pyrimidine-2,4(1*H*,3*H*)-dione (16) and 1,3-bis(2-hydroxypropyl) pyrimidine-2,4(1*H*,3*H*)-dione (17), 2-methyl-2,3-dihydro-[1,3] oxazolo[3,2-*a*]pyrimidin-7-one (18) and 2-methyl-2,3-dihydro-[1,3]thiazolo[3,2-*a*] pyrimidin-7-one (19)**

**Table S8.** *N*-Alkylation of 2-thiouracil (7)

| Entry | Heating  | PC (mmol/%) | Na <sub>2</sub> CO <sub>3</sub> | T (°C) | Time (h) | CaCl <sub>2</sub> | Yield (%)<br><b>16, 17, 18, 19</b> |
|-------|----------|-------------|---------------------------------|--------|----------|-------------------|------------------------------------|
| 1     | oil bath | 36/99%      | 4 mmol                          | 170    | 2        | 4 mmol            | 11, 5, n.i., n.i.                  |
| 2     |          | 36/99%      |                                 | 170    | 5        | 4 mmol            | 13, 13, n.i., n.i.                 |
| 3     | MW       | 36/99.7%    | 4 mmol                          | 150    | 2        | none              | n.i., 7, 34, 17                    |
| 4     |          | 36/99.7%    |                                 | 150    | 4        | none              | n.i., 30, 20, 14                   |

**Table S8, entry 1:** The 320 mg crude product obtained after lyophilization of the aqueous phase was purified by column chromatography on 10 g silica gel (0.040–0.063 mesh size), with gradient elution: CHCl<sub>3</sub>/MeOH 5/1, 2/1 and 1/1. The fractions containing the pure products were collected, evaporated and dried until constant weight:

72 mg (11%) yellowish oil **1-(2-hydroxypropyl)pyrimidine-2,4(1H,3H)-dione (16)**, C<sub>7</sub>H<sub>10</sub>N<sub>2</sub>O<sub>3</sub>: 170.17, CAS Reg. No: 1479918-99-4, R<sub>f</sub> = 0.40 (CHCl<sub>3</sub>/MeOH 5/1), rt = 0.23' (94%), m/z = 171.

<sup>1</sup>H NMR (400 MHz, DMSO-*d*<sub>6</sub>): δ = 1.04 (d, *J* = 6.2 Hz, 3H, CH<sub>3</sub>), 3.38 (dd, *J* = 13.6, 8.4 Hz, 1H, CH<sub>2</sub>), 3.71 (dd, *J* = 13.6, 3.6 Hz, 1H, CH<sub>2</sub>), 3.82 (m, 1H, CHOH), 5.49 (d, *J* = 7.8 Hz, 1H, O=CCH), 7.52 (d, *J* = 7.8 Hz, 1H, NCH).

<sup>13</sup>C NMR (100 MHz, DMSO-*d*<sub>6</sub>): δ = 20.7, 54.5, 64.0, 100.0, 146.9, 151.3, 164.1.

42 mg (5%) white oily solid **1,3-bis(2-hydroxypropyl)pyrimidine-2,4(1H,3H)-dione (17)**, C<sub>10</sub>H<sub>16</sub>N<sub>2</sub>O<sub>4</sub>: 228.25, R<sub>f</sub> = 0.55 (CHCl<sub>3</sub>/MeOH 5/1), rt = 0.22' (100%), m/z = 229.

<sup>1</sup>H NMR (400 MHz, DMSO-*d*<sub>6</sub>): δ = 1.00 (d, *J* = 6.0 Hz, 3H, N<sup>3</sup>CH<sub>2</sub>CHCH<sub>3</sub>), 1.05 (d, *J* = 6.2 Hz, 3H, N<sup>1</sup>CH<sub>2</sub>CHCH<sub>3</sub>), 3.44 (m, 1H, N<sup>1</sup>CH<sub>2</sub>), 3.66 (m, 1H, N<sup>3</sup>CH<sub>2</sub>), 3.77 (m, 1H, N<sup>1</sup>CH<sub>2</sub>), 3.84 (m, 1H, N<sup>3</sup>CH<sub>2</sub>), 3.83 (m, 1H, N<sup>1</sup>CH<sub>2</sub>CH), 3.89 (m, 1H, N<sup>3</sup>CH<sub>2</sub>CH), 4.67 (d, *J* = 5.2 Hz, 1H, N<sup>3</sup>CH<sub>2</sub>CHOH), 4.93 (d, *J* = 4.8 Hz, 1H, N<sup>1</sup>CH<sub>2</sub>CHOH), 5.63 (d, *J* = 7.8 Hz, 1H, O=CCH), 7.54 (d, *J* = 7.8 Hz, 1H, NCH).

<sup>13</sup>C NMR (100 MHz, DMSO-*d*<sub>6</sub>): δ = 20.7, 21.1, 47.1, 55.7, 63.3, 64.0, 99.4, 145.3, 151.5, 162.9.

**Table S8, entry 2:** The 728 mg crude product obtained after lyophilization of the aqueous phase was purified by column chromatography on 10 g silica gel (0.040–0.063 mesh size), with gradient elution: CHCl<sub>3</sub>/MeOH 5/1, 2/1 and 1/1. The fractions containing the pure products were collected, evaporated and dried until constant weight: 88 mg (13%) product **16** and 123 mg (13%) product **17**.

**Table S8, entry 3:** The 784 mg crude product obtained after lyophilization of the aqueous phase was purified by column chromatography on 10 g silica gel (0.040–0.063 mesh size), with gradient elution: CHCl<sub>3</sub>, followed by CHCl<sub>3</sub>/MeOH 5/1, 2/1 and 1/1. The fractions containing the pure products were collected, evaporated and dried until constant weight:

64 mg (7%) white oily solid **1,3-bis(2-hydroxypropyl)pyrimidine-2,4(1H,3H)-dione (17)**, C<sub>10</sub>H<sub>16</sub>N<sub>2</sub>O<sub>4</sub>: 228.25, R<sub>f</sub> = 0.55 (CHCl<sub>3</sub>/MeOH 5/1), rt = 0.22' (100%), m/z = 229;

209 mg (34%) light yellow solid **2-methyl-2,3-dihydro-[1,3]oxazolo[3,2-*a*]pyrimidin-7-one (18)**, C<sub>7</sub>H<sub>8</sub>N<sub>2</sub>O<sub>2</sub>: 152.15, CAS Reg. No: 261920-67-6<sup>[12, 13]</sup>, R<sub>f</sub> = 0.13 (CHCl<sub>3</sub>/MeOH 5/1), Mp. > 250 °C (decomp.), rt = 0.21' (100%), m/z = 153 and 327 [2M + Na];

<sup>1</sup>H NMR (400 MHz, DMSO-*d*<sub>6</sub>+D<sub>2</sub>O 9:1): δ = 1.40 (d, *J* = 6.2 Hz, 3H, CH<sub>3</sub>), 3.85 (dd, *J* = 10.3, 7.6 Hz, 1H, CH<sub>2</sub>), 4.34 (dd, *J* = 11.3, 8.8 Hz, 1H, CH<sub>2</sub>), 5.12 (m, 1H, OCH), 5.94 (d, *J* = 7.4 Hz, 1H, O=CCH), 7.59 (d, *J* = 7.4 Hz, 1H, NCH).

<sup>13</sup>C NMR (100 MHz, DMSO-*d*<sub>6</sub>+D<sub>2</sub>O): δ = 20.7, 54.2, 79.9, 109.0, 142.2, 163.1, 177.1.

114 mg (17%) yellow solid **2-methyl-2,3-dihydro-[1,3]thiazolo[3,2-*a*]pyrimidin-7-one (19)**, C<sub>7</sub>H<sub>8</sub>N<sub>2</sub>OS: 168.21, CAS Reg. No: 907171-18-0, R<sub>f</sub> = 0.30 (CHCl<sub>3</sub>/MeOH 5/1), Mp: 167.6–169.3 °C, rt = 0.21' (100%), m/z = 169.



<sup>1</sup>H NMR (400 MHz, DMSO-*d*<sub>6</sub>): δ = 1.44 (d, *J* = 6.7 Hz, 3H, CH<sub>3</sub>), 4.04 (dd, *J* = 11.3, 5.8 Hz, 1H, CH<sub>2</sub>), 4.12 (m, 1H, SCH), 4.42 (dd, *J* = 11.3, 7.0 Hz, 1H, CH<sub>2</sub>), 5.84 (d, *J* = 7.5 Hz, 1H, O=CCH), 7.76 (d, *J* = 7.5 Hz, 1H, NCH).

<sup>13</sup>C NMR (100 MHz, DMSO-*d*<sub>6</sub>): δ = 20.2, 39.5, 59.5, 108.1, 140.8, 166.6, 168.6.

**Table S8, entry 4:** The 750 mg crude product obtained after lyophilization of the aqueous phase was purified by column chromatography on 10 g silica gel (0.040–0.063 mesh size), with gradient elution: CHCl<sub>3</sub>/MeOH 5/1, 2/1 and 1/1. The fractions containing the pure products were collected, evaporated and dried until constant weight:

276 mg (30%) white oily solid **1,3-bis(2-hydroxypropyl)pyrimidine-2,4(1*H*,3*H*)-dione (17)**, 123 mg (20%) light yellow solid **2-methyl-2,3-dihydro-[1,3] oxazolo[3,2-*a*]pyrimidin-7-one (18)**, and 91 mg (14%) yellow solid **2-methyl-2,3-dihydro-[1,3]thiazolo[3,2-*a*] pyrimidin-7-one (19)**.

## HPLC-MS data, $^1\text{H}$ - and $^{13}\text{C}$ -NMR spectra

### 2-(2-hydroxypropyl)-1*H*-isoindole-1,3(2*H*)-dione (**8**)

Figure S1. HPLC-MS data of **8**

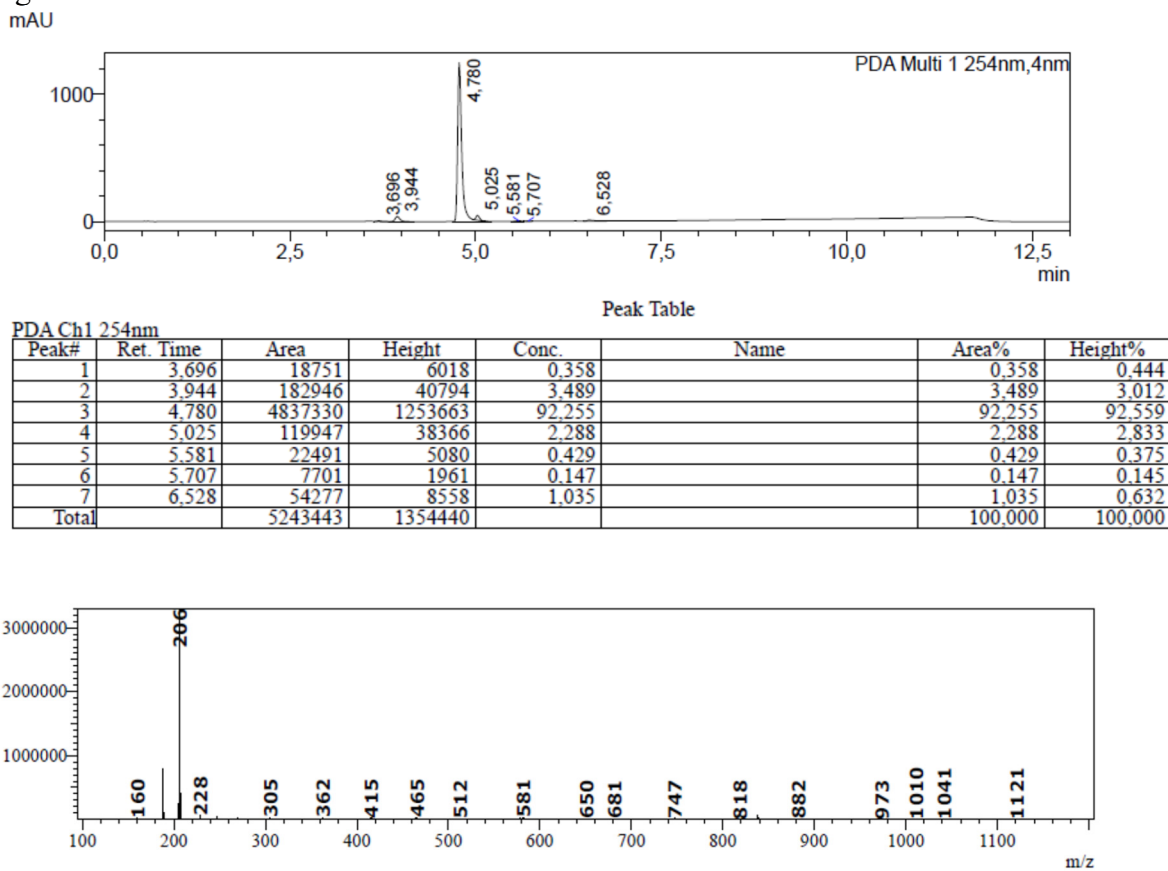

Figure S2.  $^1\text{H}$  NMR spectrum of **8**

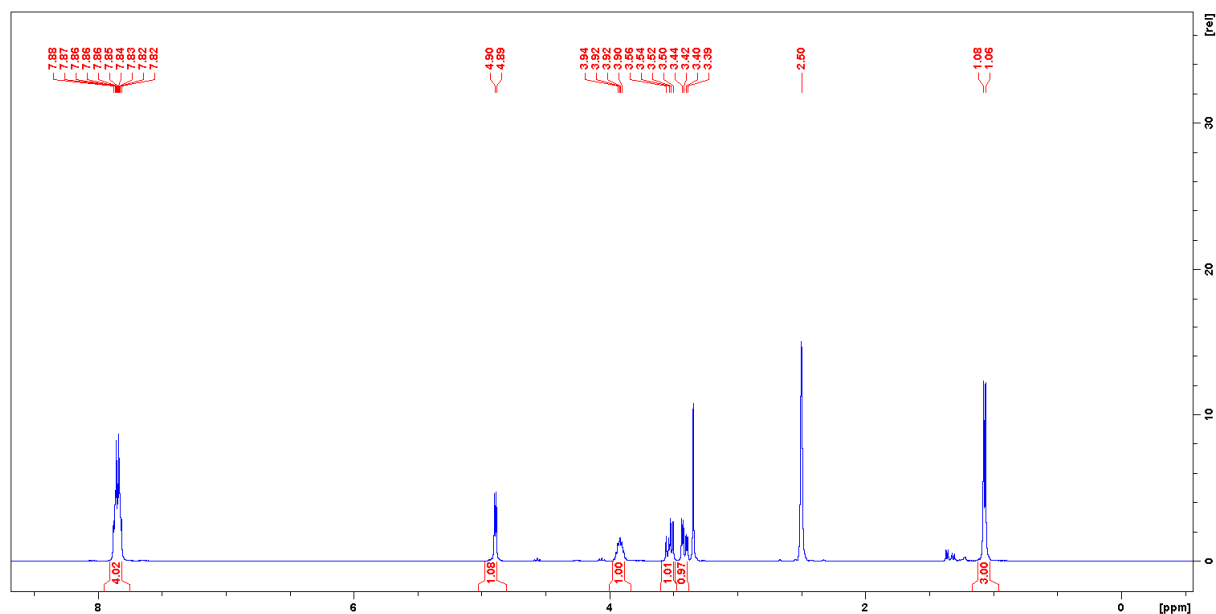

Figure S3.  $^{13}\text{C}$  NMR spectrum of **8**

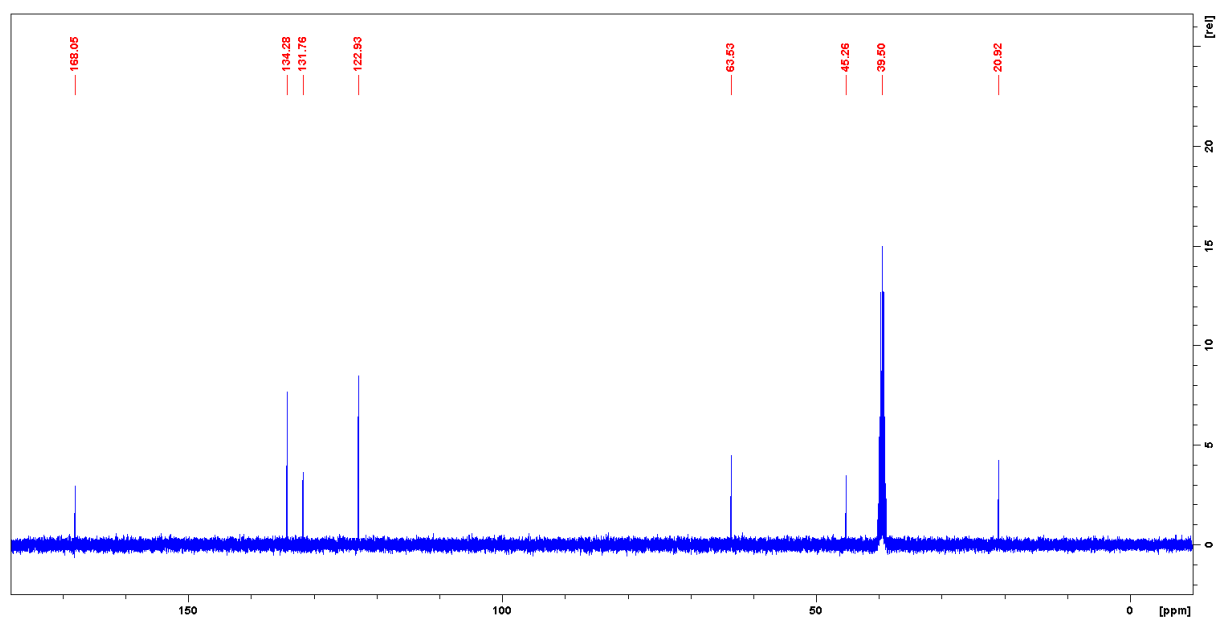

### 1-(2-hydroxypropyl)-1*H*-indole-2,3-dione (**9**)

Figure S4. HPLC-MS data of **9**

mAU

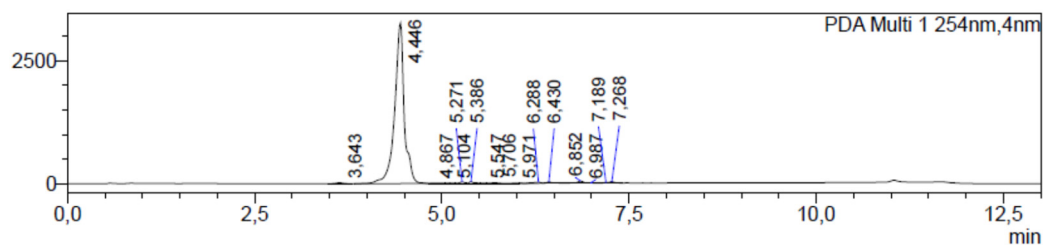

Peak Table

| Peak# | Ret. Time | Area     | Height  | Conc.  | Name | Area%   | Height% |
|-------|-----------|----------|---------|--------|------|---------|---------|
| 1     | 3.643     | 88987    | 14115   | 0.291  |      | 0.291   | 0.399   |
| 2     | 4.446     | 29089657 | 3264989 | 95.218 |      | 95.218  | 92.261  |
| 3     | 4.867     | 78091    | 8891    | 0.256  |      | 0.256   | 0.251   |
| 4     | 5.104     | 44971    | 9177    | 0.147  |      | 0.147   | 0.259   |
| 5     | 5.271     | 148485   | 31609   | 0.486  |      | 0.486   | 0.893   |
| 6     | 5.386     | 174038   | 36695   | 0.570  |      | 0.570   | 1.037   |
| 7     | 5.547     | 24635    | 6462    | 0.081  |      | 0.081   | 0.183   |
| 8     | 5.706     | 89163    | 14292   | 0.292  |      | 0.292   | 0.404   |
| 9     | 5.971     | 21662    | 6041    | 0.071  |      | 0.071   | 0.171   |
| 10    | 6.288     | 180584   | 22339   | 0.591  |      | 0.591   | 0.631   |
| 11    | 6.430     | 156506   | 29581   | 0.512  |      | 0.512   | 0.836   |
| 12    | 6.852     | 257520   | 44207   | 0.843  |      | 0.843   | 1.249   |
| 13    | 6.987     | 17234    | 4423    | 0.056  |      | 0.056   | 0.125   |
| 14    | 7.189     | 58659    | 17055   | 0.192  |      | 0.192   | 0.482   |
| 15    | 7.268     | 120538   | 28993   | 0.395  |      | 0.395   | 0.819   |
| Total |           | 30550730 | 3538869 |        |      | 100.000 | 100.000 |

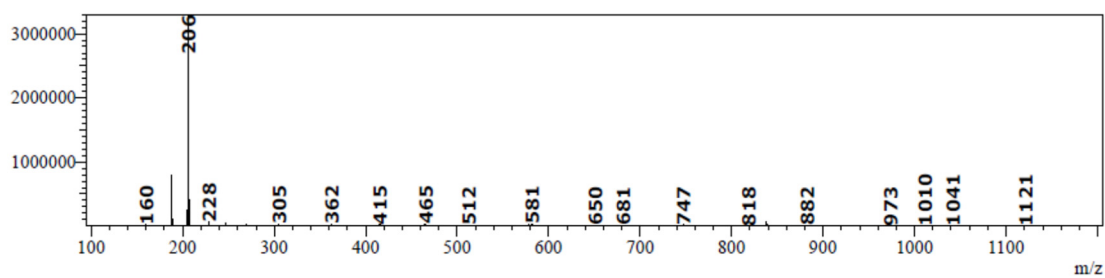

Figure S5.  $^1\text{H}$  NMR spectrum of **9**

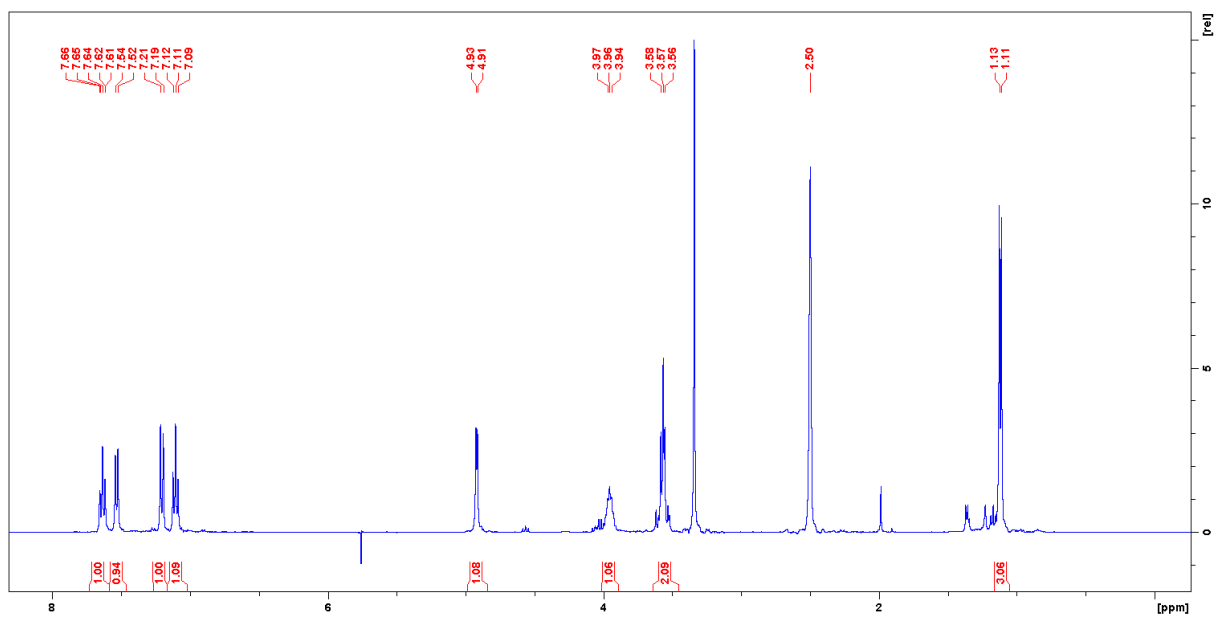

Figure S6.  $^{13}\text{C}$  NMR spectrum of **9**

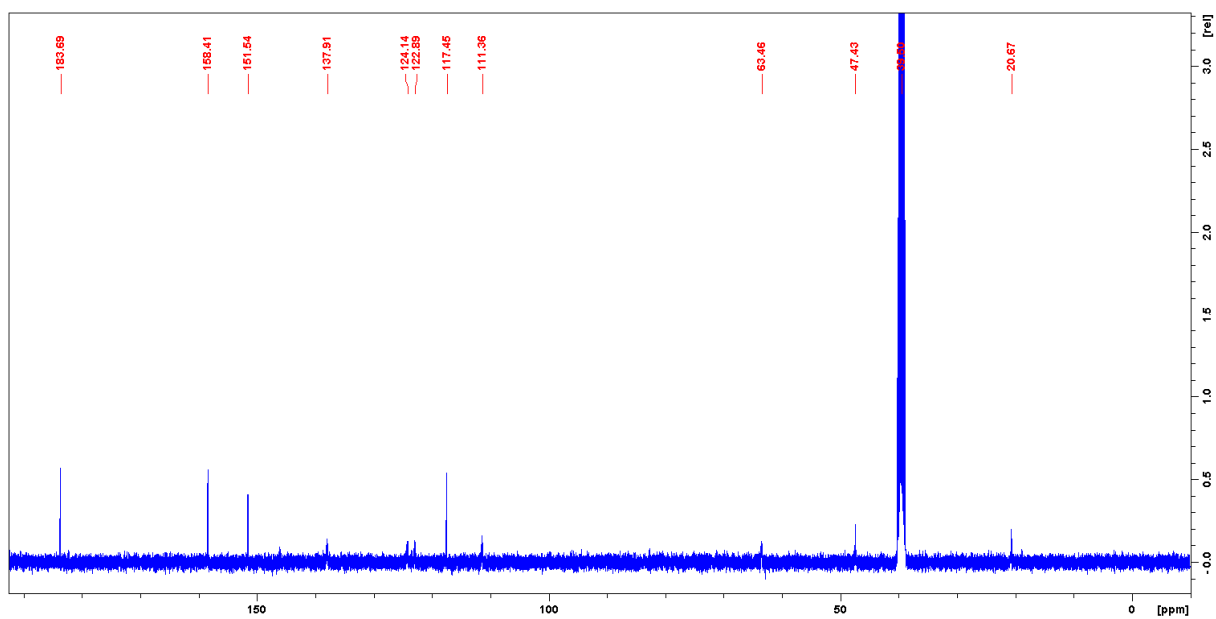

## 2-(2-hydroxypropyl)phthalazin-1(2H)-one (10)

Figure S7. HPLC-MS data of 10

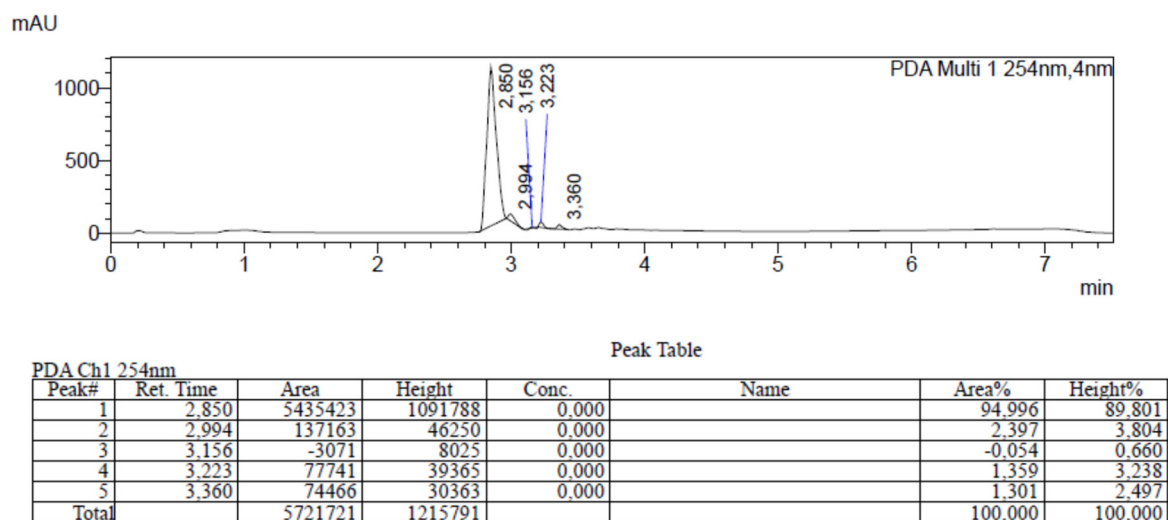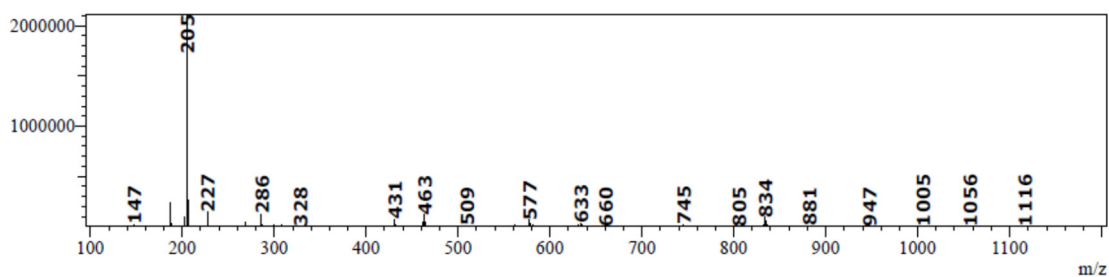

Figure S8.  $^1\text{H}$  NMR spectrum of 10

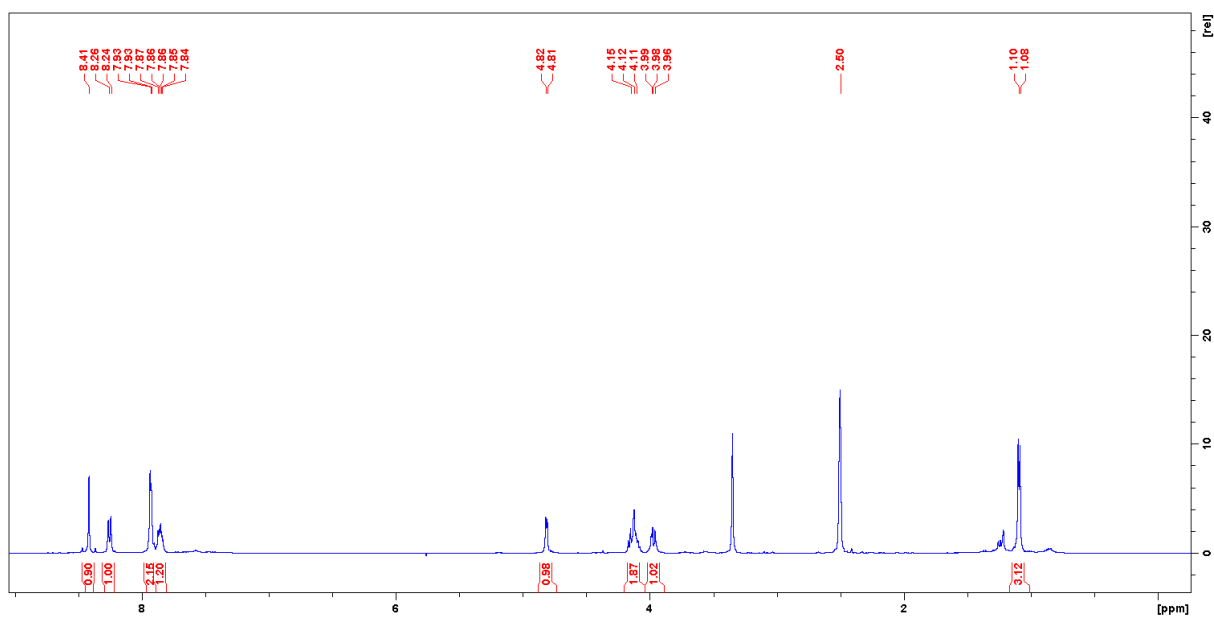

Figure S9. <sup>13</sup>C NMR spectrum of **10**

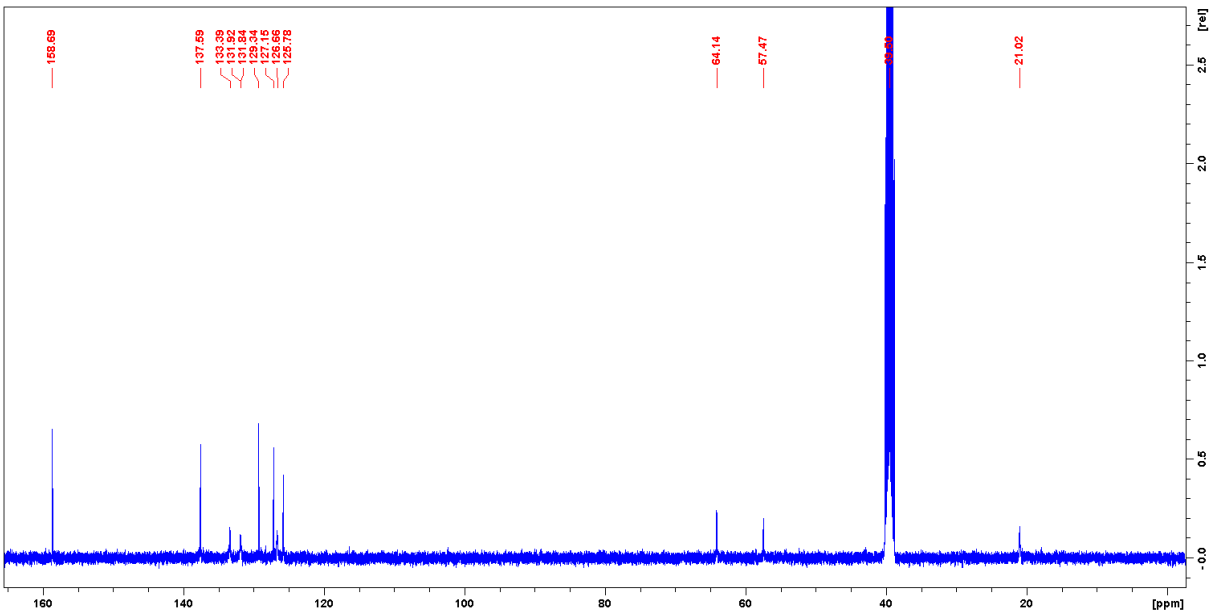

**3-(2-hydroxypropyl)pyrimidin-4(3*H*)-one (**11**)**

Figure S10. HPLC-MS data of **11**

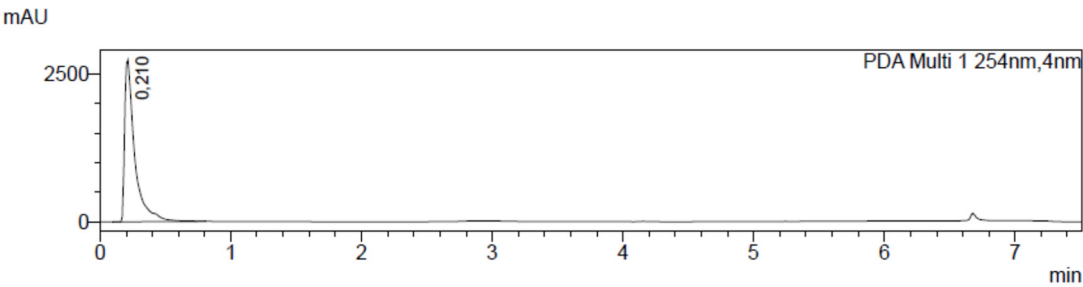

Peak Table

| Peak# | Ret. Time | Area     | Height  | Conc. | Name | Area%   | Height% |
|-------|-----------|----------|---------|-------|------|---------|---------|
| 1     | 0.210     | 14623646 | 2732183 | 0.000 |      | 100.000 | 100.000 |
| Total |           | 14623646 | 2732183 |       |      | 100.000 | 100.000 |

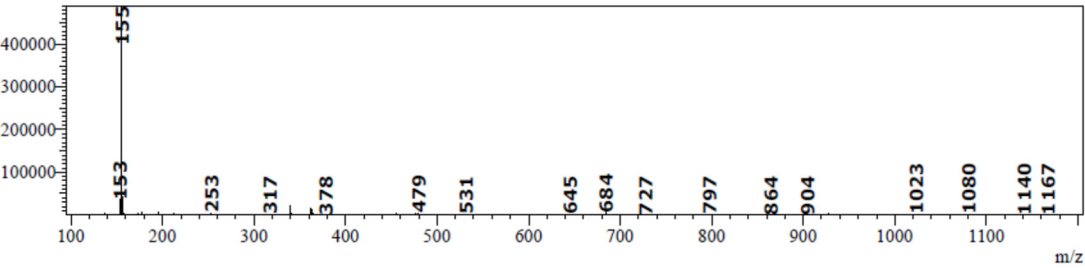

Figure S11.  $^1\text{H}$  NMR spectrum of **11**

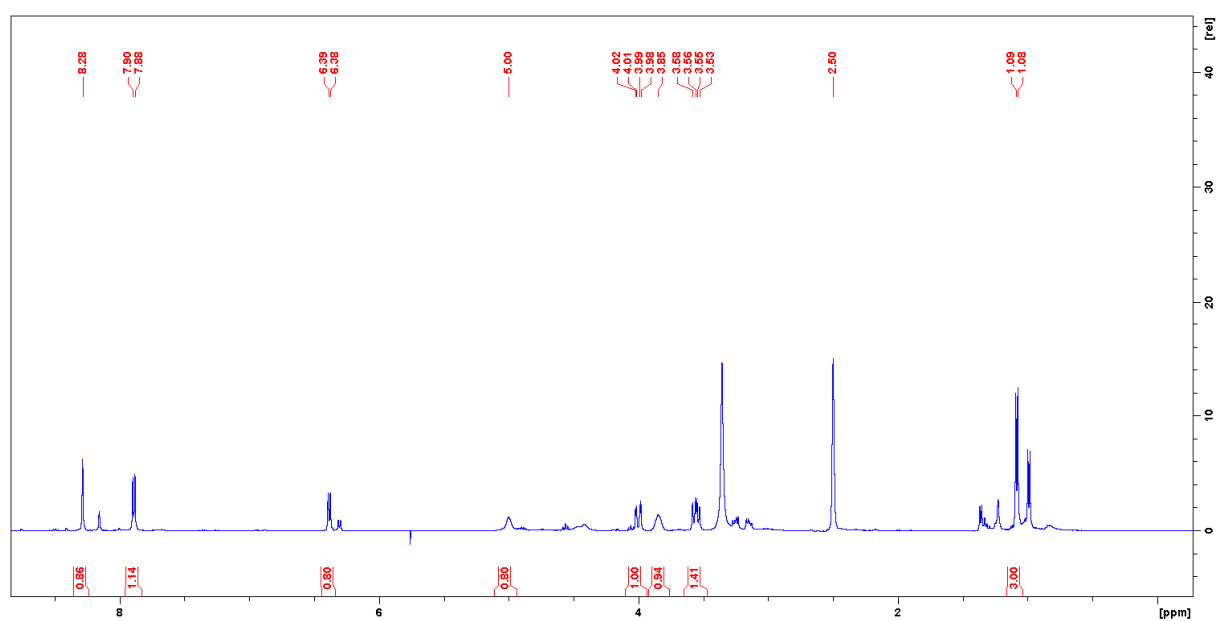

Figure S12.  $^{13}\text{C}$  NMR spectrum of **11**

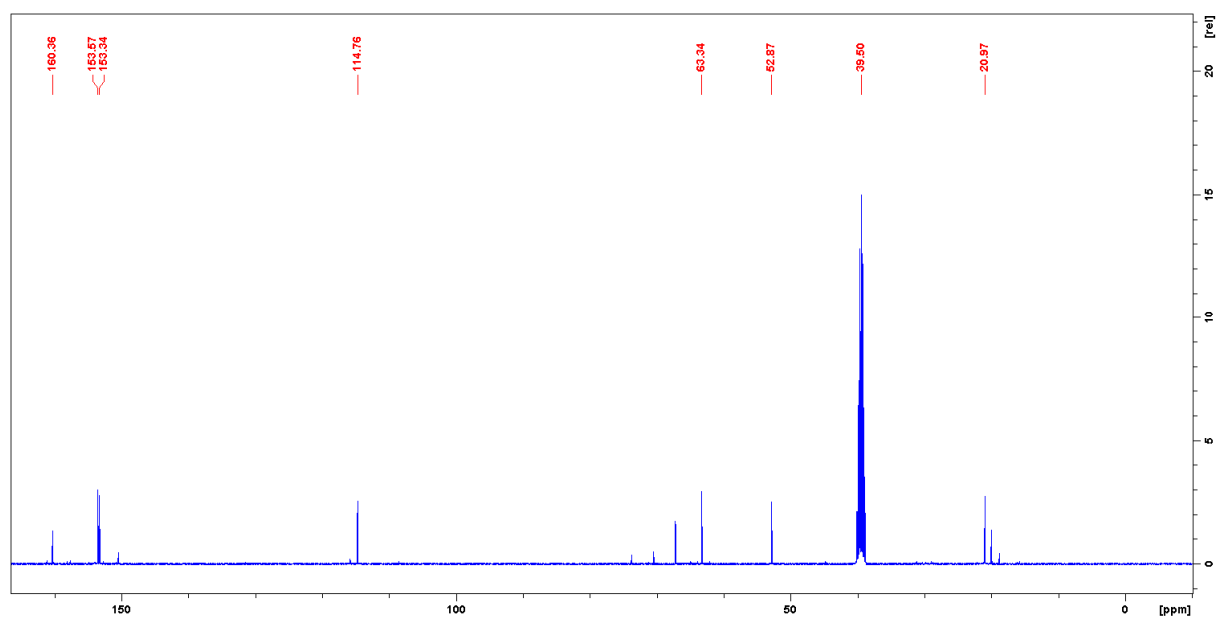

Figure S13. HPLC-MS data of **12**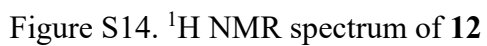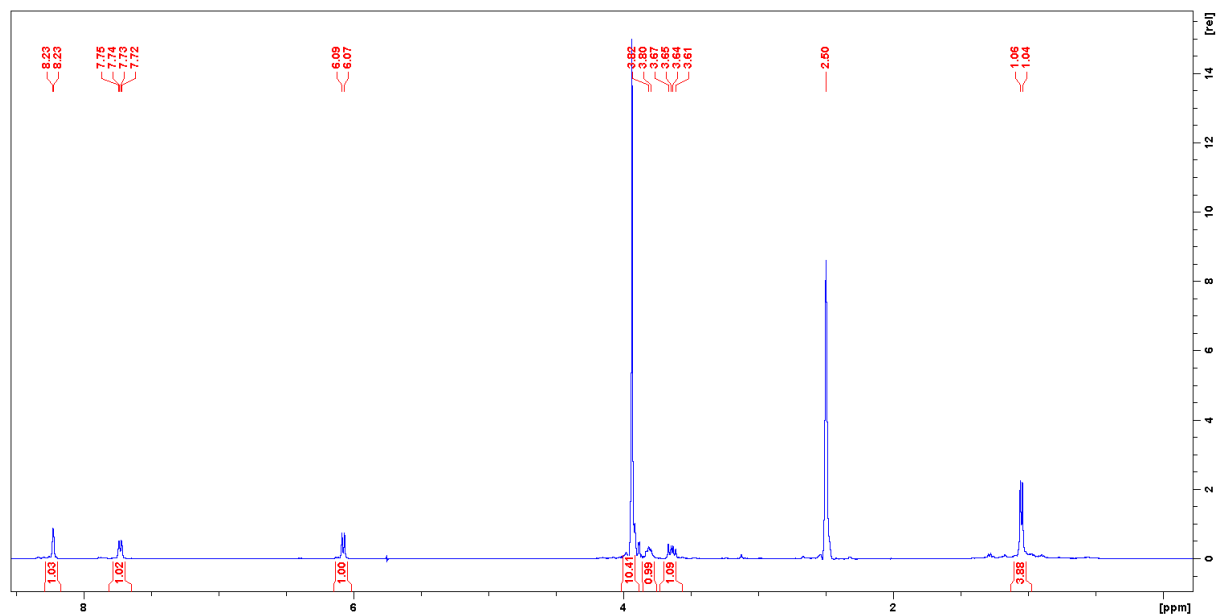



Figure S15.  $^{13}\text{C}$  NMR spectrum of **12**

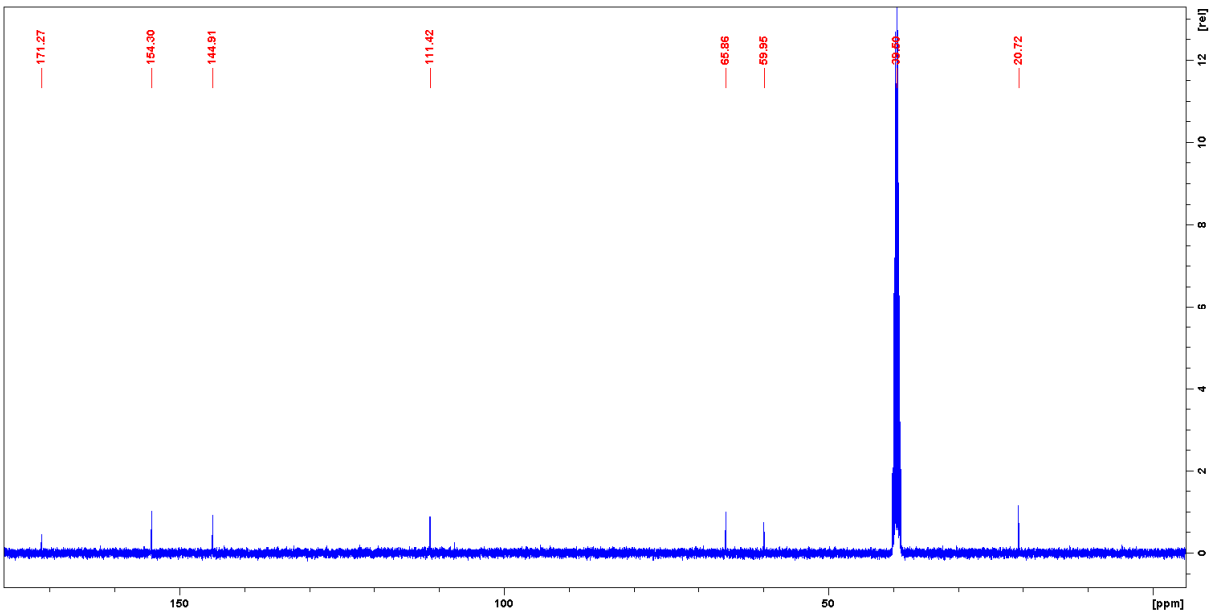

**1,3-bis(2-hydroxypropyl)-6-methylpyrimidine-2,4(1*H*,3*H*)-dione (**13**)**

Figure S16. HPLC-MS data of **13**

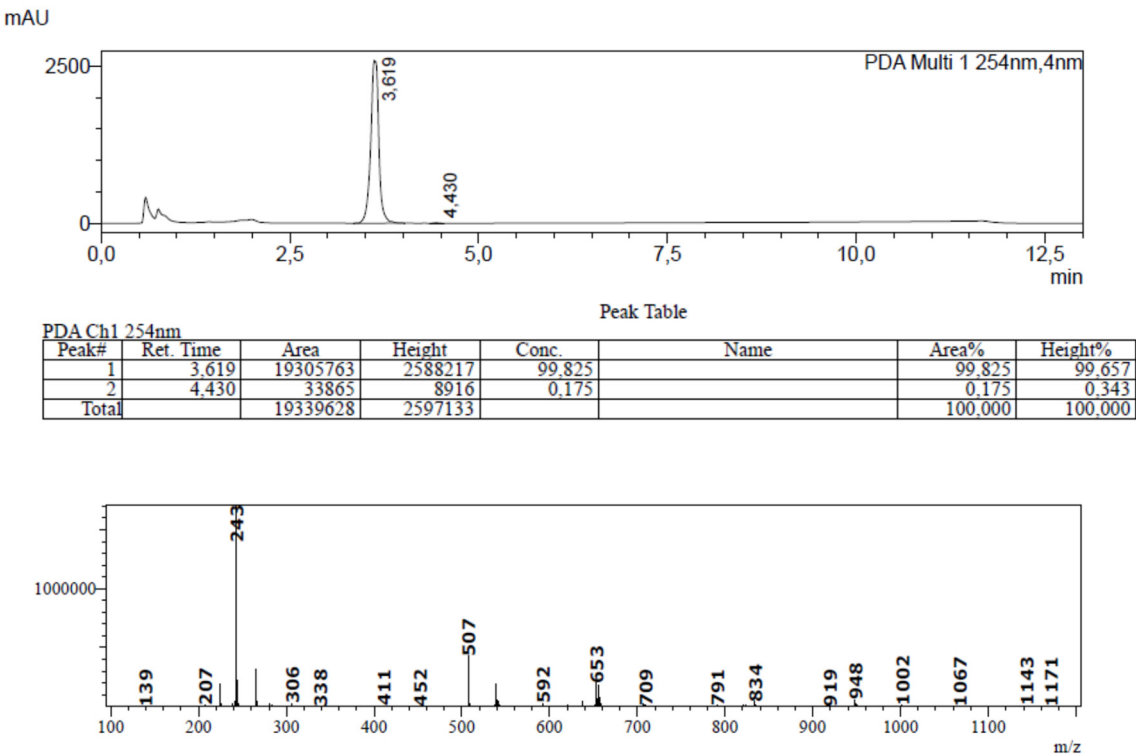

Figure S17.  $^1\text{H}$  NMR spectrum of **13**

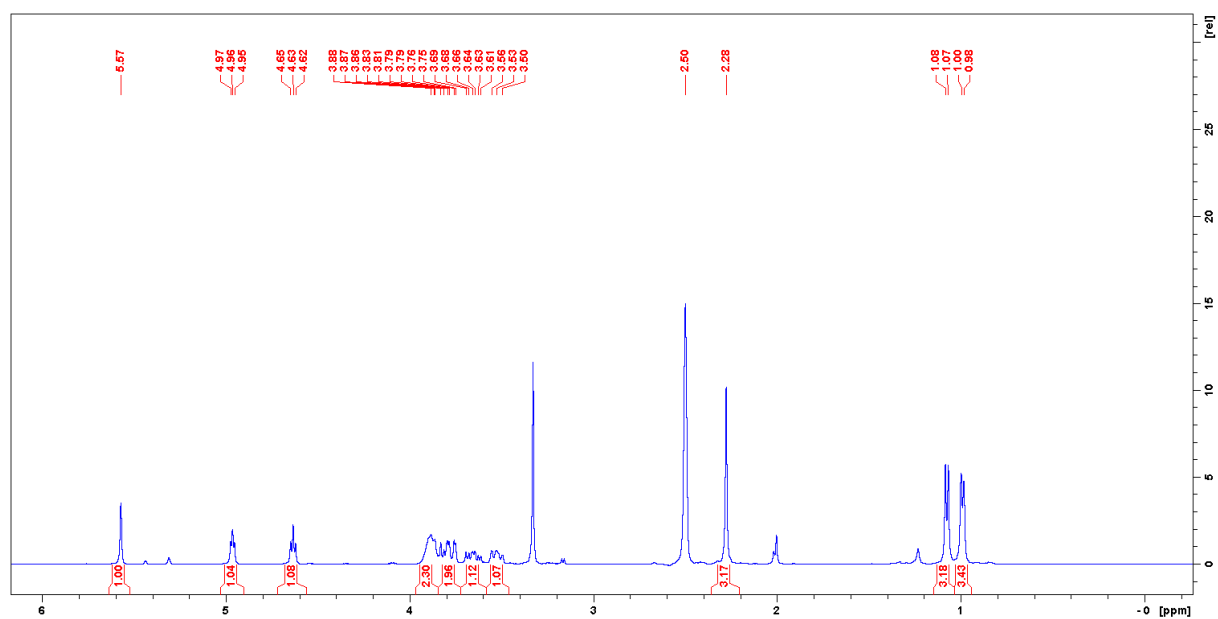

Figure S18.  $^{13}\text{C}$  NMR spectrum of **13**

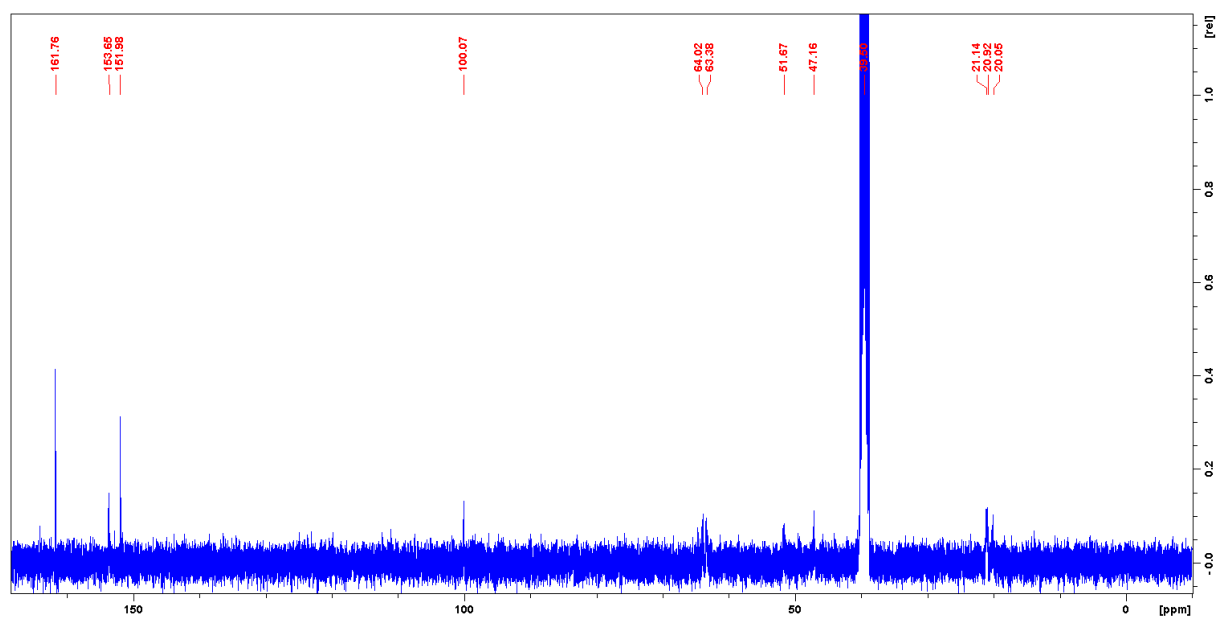

## 2-(2-hydroxypropyl)benzotriazole (14)

Figure S19. HPLC-MS data of **14**

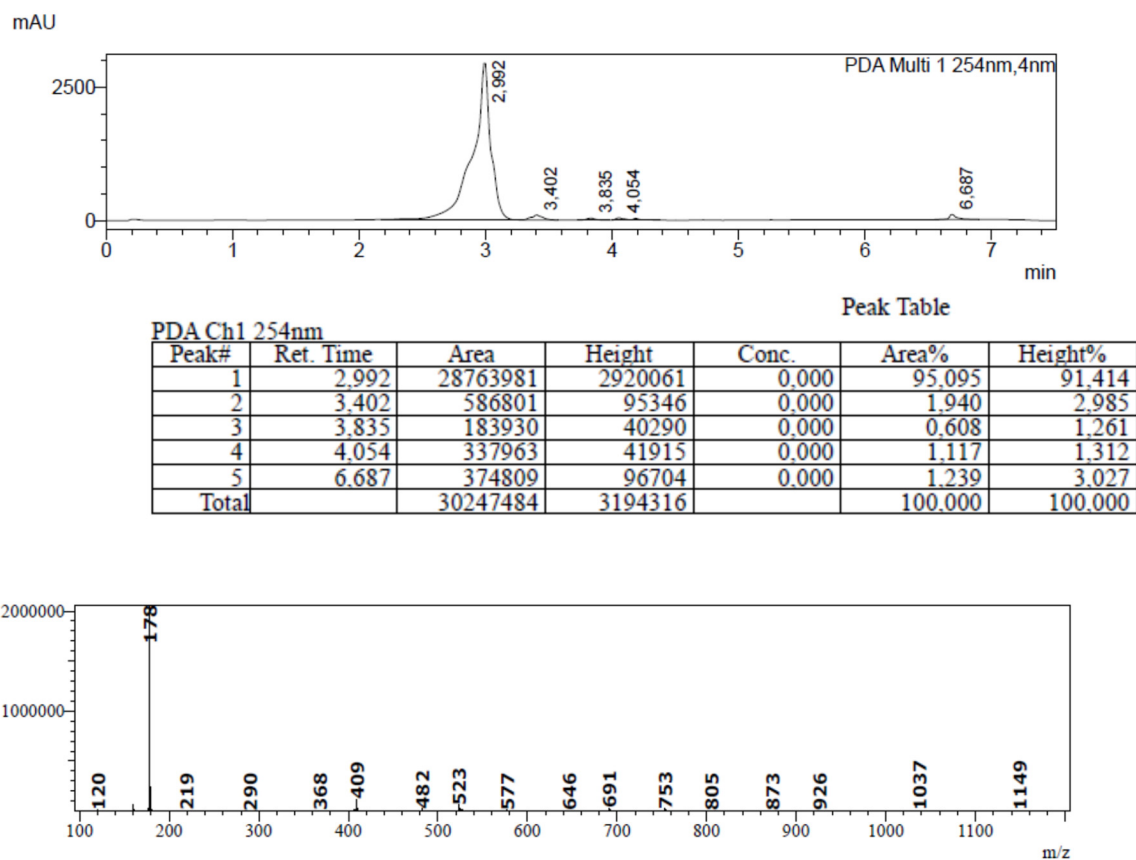

Figure S20.  $^1\text{H}$  NMR spectrum of **14**

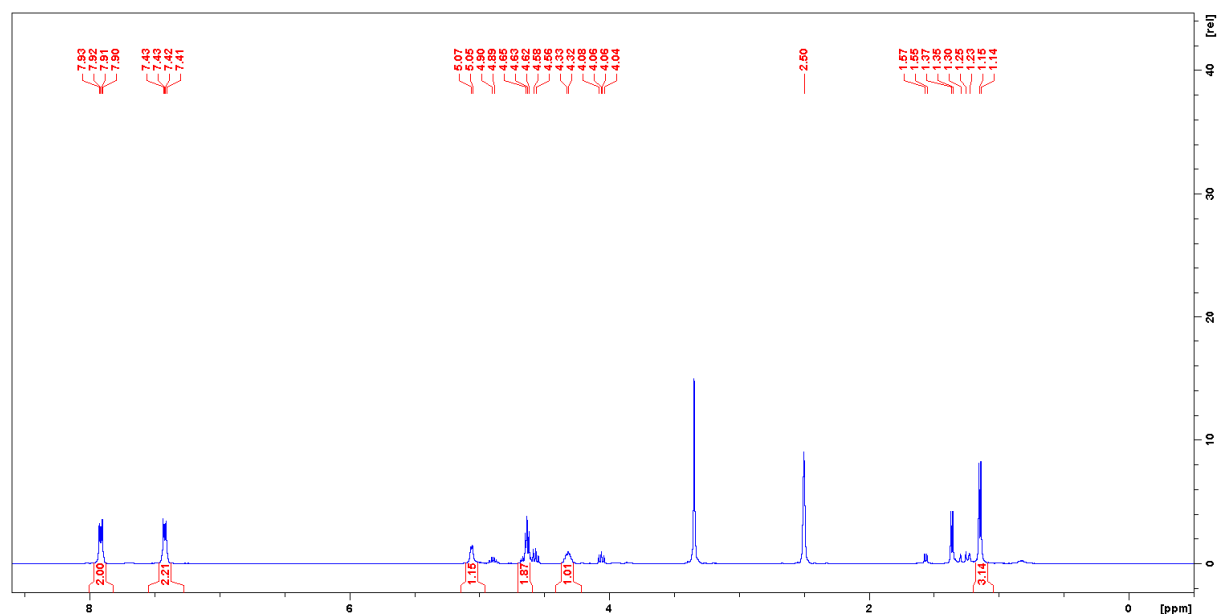

Figure S21.  $^{13}\text{C}$  NMR spectrum of **14**

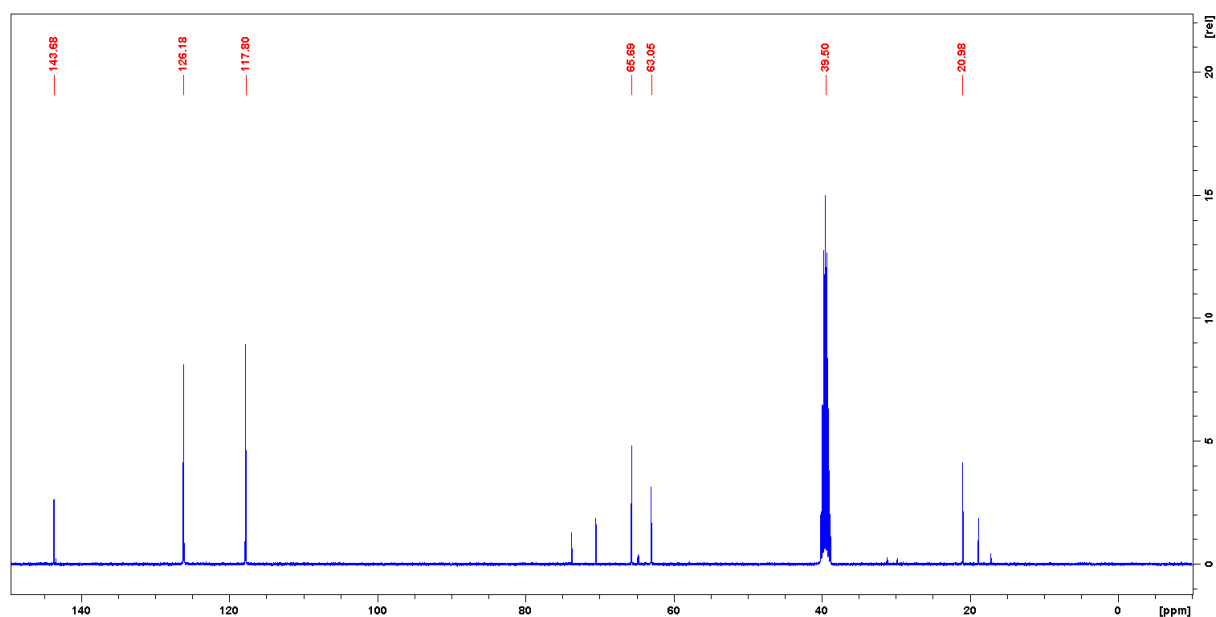

### 1-(2-hydroxypropyl) benzotriazole (**15**)

Figure S22. HPLC-MS data of **15**

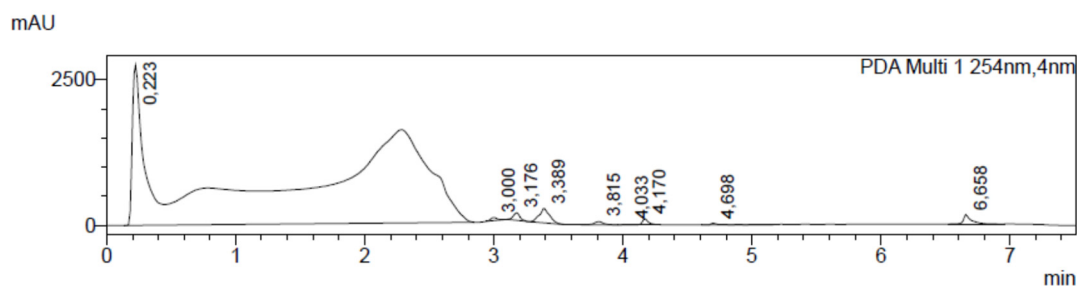

PDA Ch1 254nm

Peak Table

| Peak# | Ret. Time | Area      | Height  | Conc. | Area%   | Height% |
|-------|-----------|-----------|---------|-------|---------|---------|
| 1     | 0.223     | 120562288 | 2751088 | 0.000 | 97.297  | 77.911  |
| 2     | 3.000     | 200163    | 53982   | 0.000 | 0.162   | 1.529   |
| 3     | 3.176     | 439607    | 130072  | 0.000 | 0.355   | 3.684   |
| 4     | 3.389     | 1353830   | 245208  | 0.000 | 1.093   | 6.944   |
| 5     | 3.815     | 255305    | 52707   | 0.000 | 0.206   | 1.493   |
| 6     | 4.033     | 26079     | 7480    | 0.000 | 0.021   | 0.212   |
| 7     | 4.170     | 312897    | 100214  | 0.000 | 0.253   | 2.838   |
| 8     | 4.698     | 96849     | 27419   | 0.000 | 0.078   | 0.777   |
| 9     | 6.658     | 664787    | 162877  | 0.000 | 0.537   | 4.613   |
| Total |           | 123911806 | 3531047 |       | 100.000 | 100.000 |

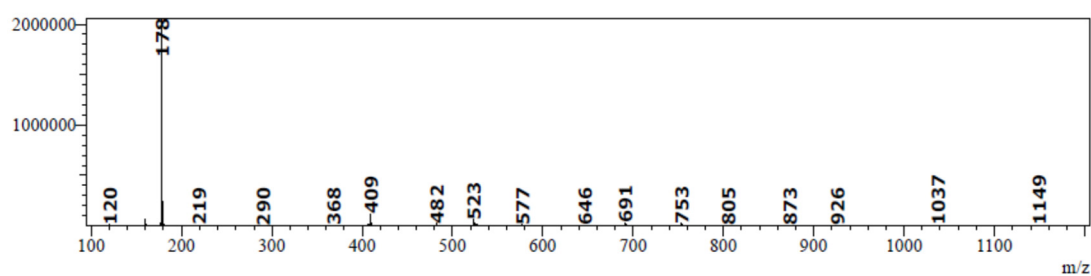

Figure S23.  $^1\text{H}$  NMR spectrum of **15**

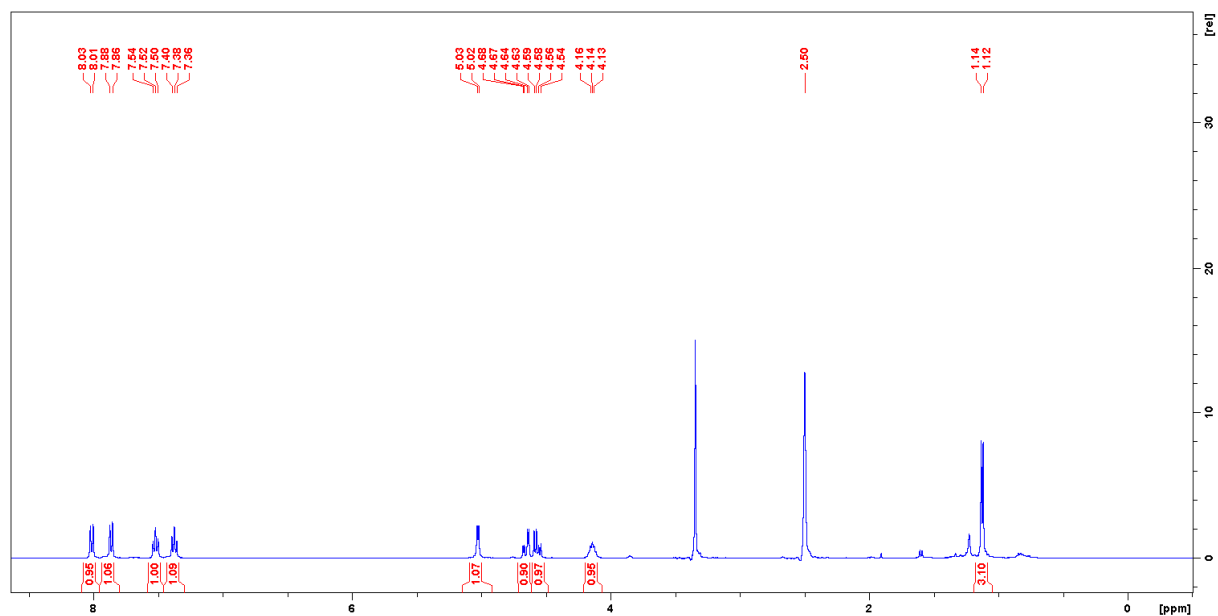

Figure S24. <sup>13</sup>C NMR spectrum of **15**

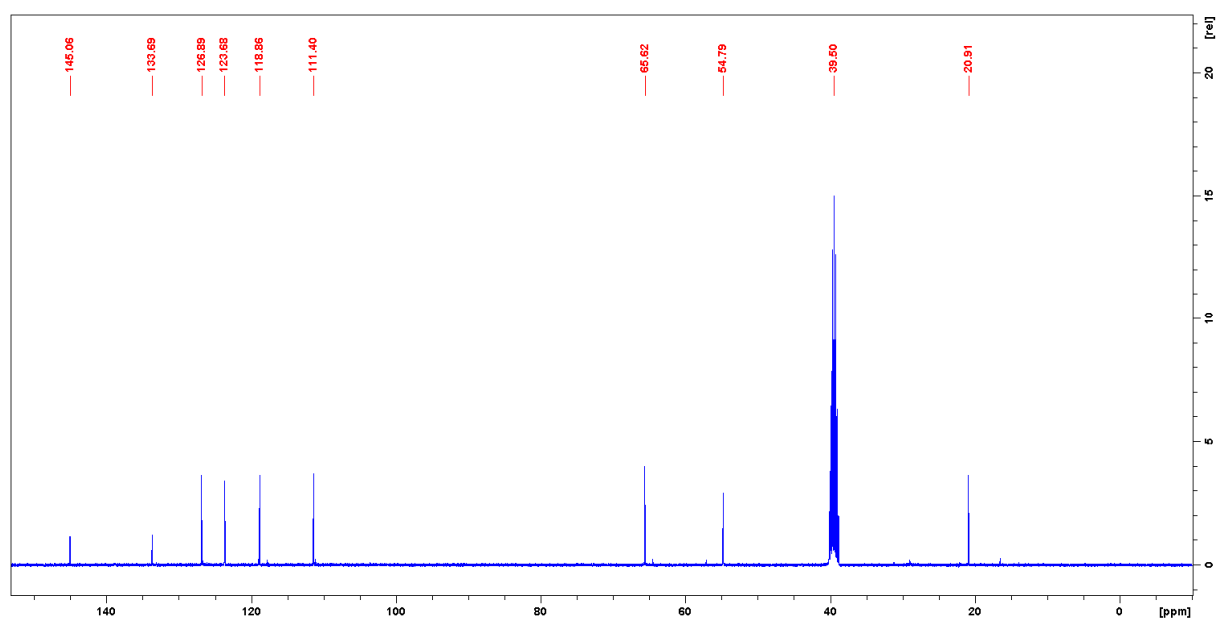

**1-(2-hydroxypropyl)pyrimidine-2,4(1*H*,3*H*)-dione (16)**

Figure S25. HPLC-MS data of **16**

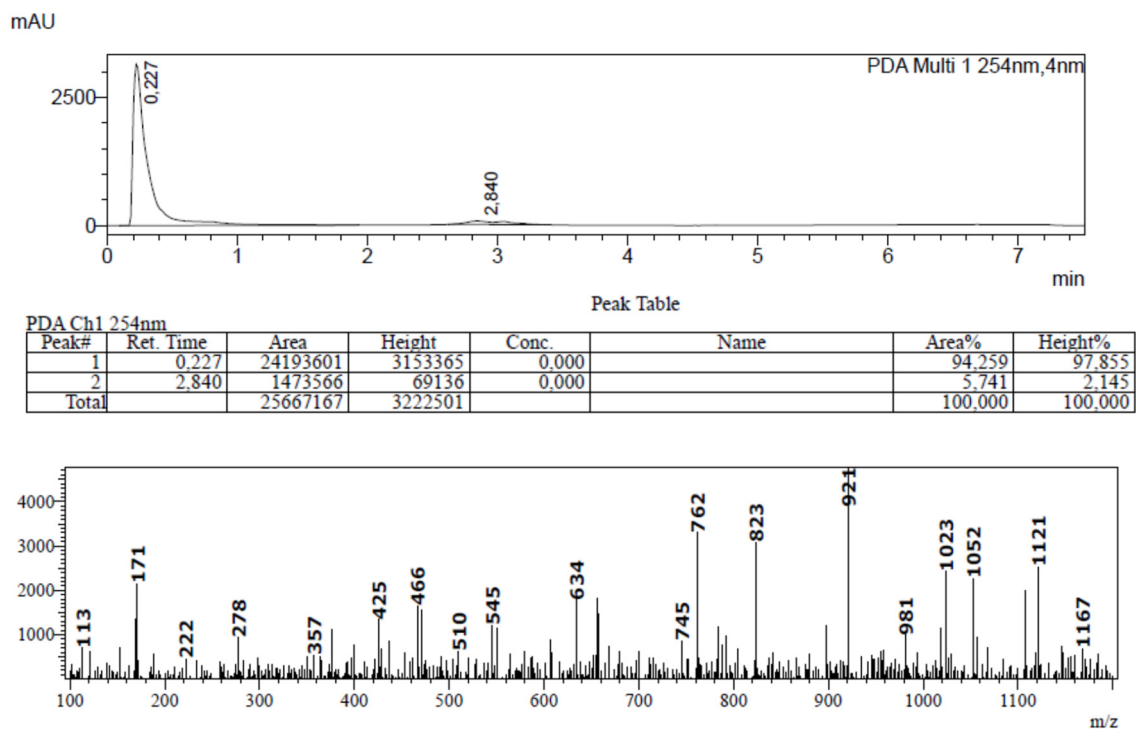

Figure S26.  $^1\text{H}$  NMR spectrum of **16**

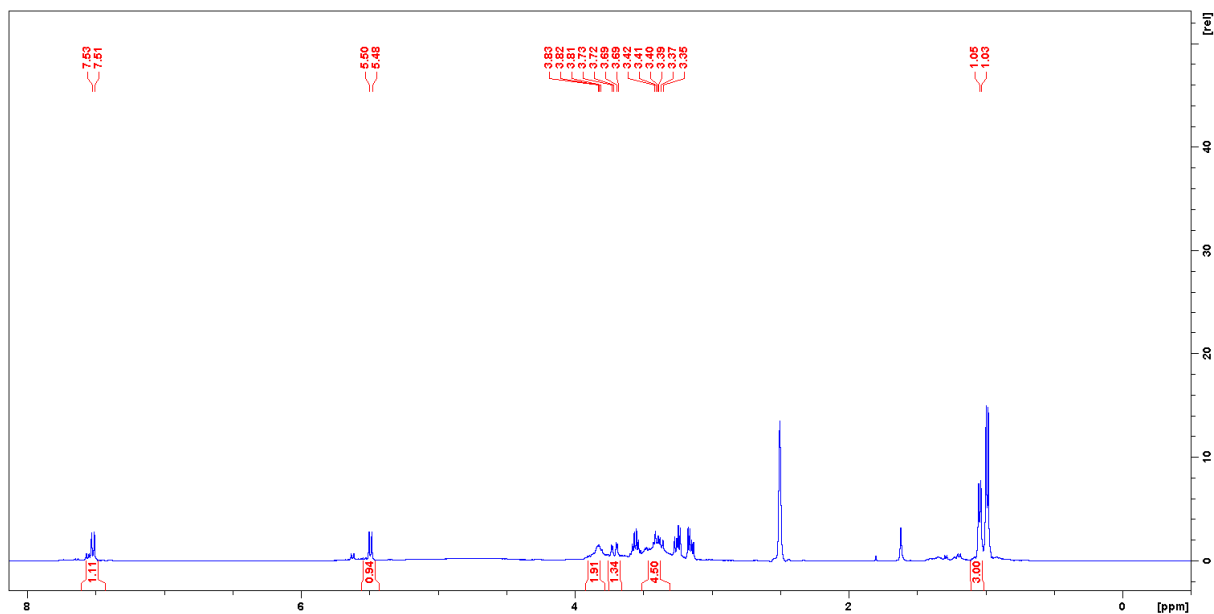

Figure S27.  $^{13}\text{C}$  NMR spectrum of **16**

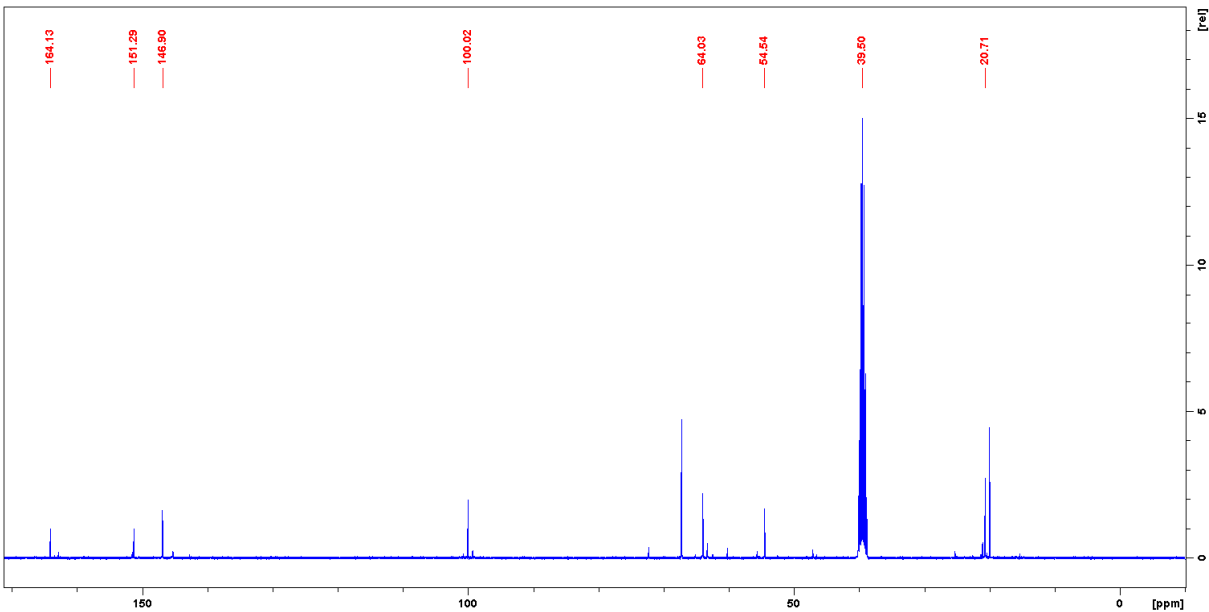

**1,3-bis(2-hydroxypropyl)pyrimidine-2,4(1*H*,3*H*)-dione (**17**)**

Figure S28. HPLC-MS data of **17**

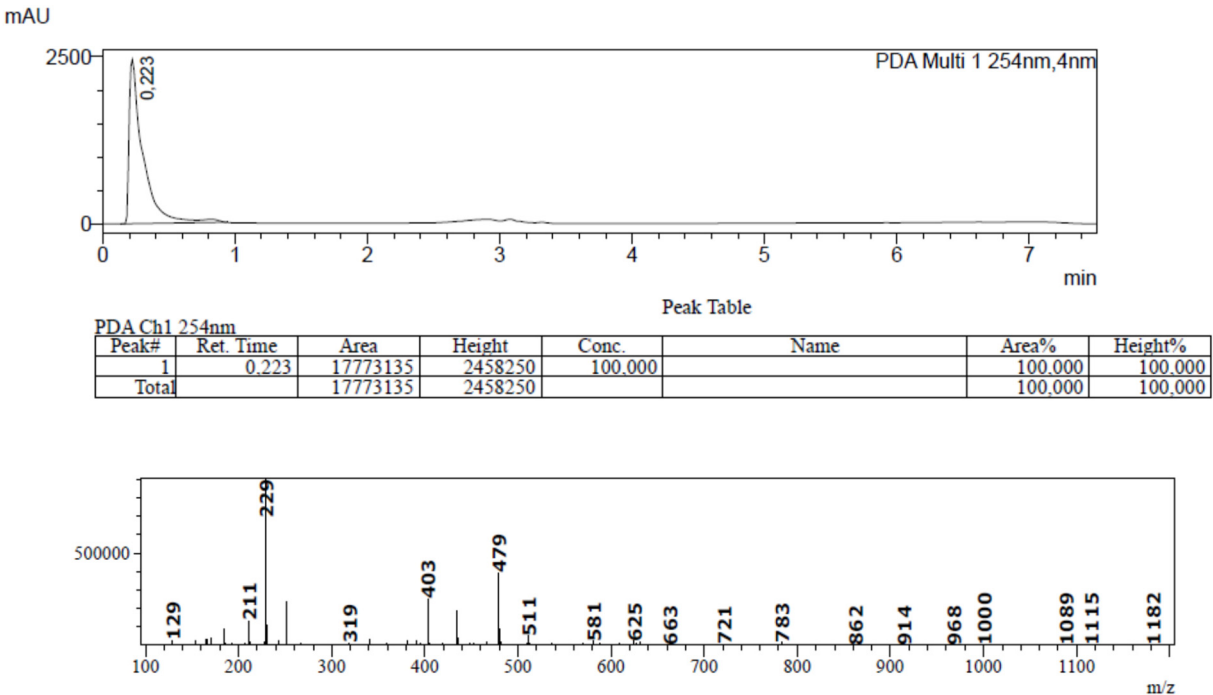

Figure S29.  $^1\text{H}$  NMR spectrum of **17**

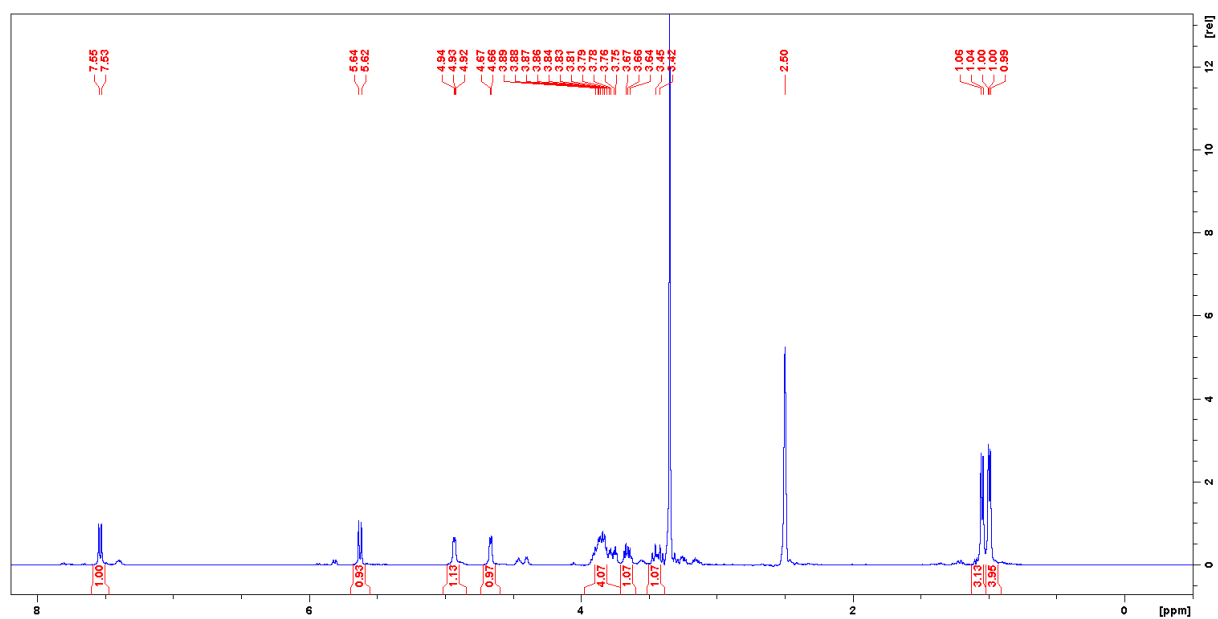

Figure S30.  $^{13}\text{C}$  NMR spectrum of **17**

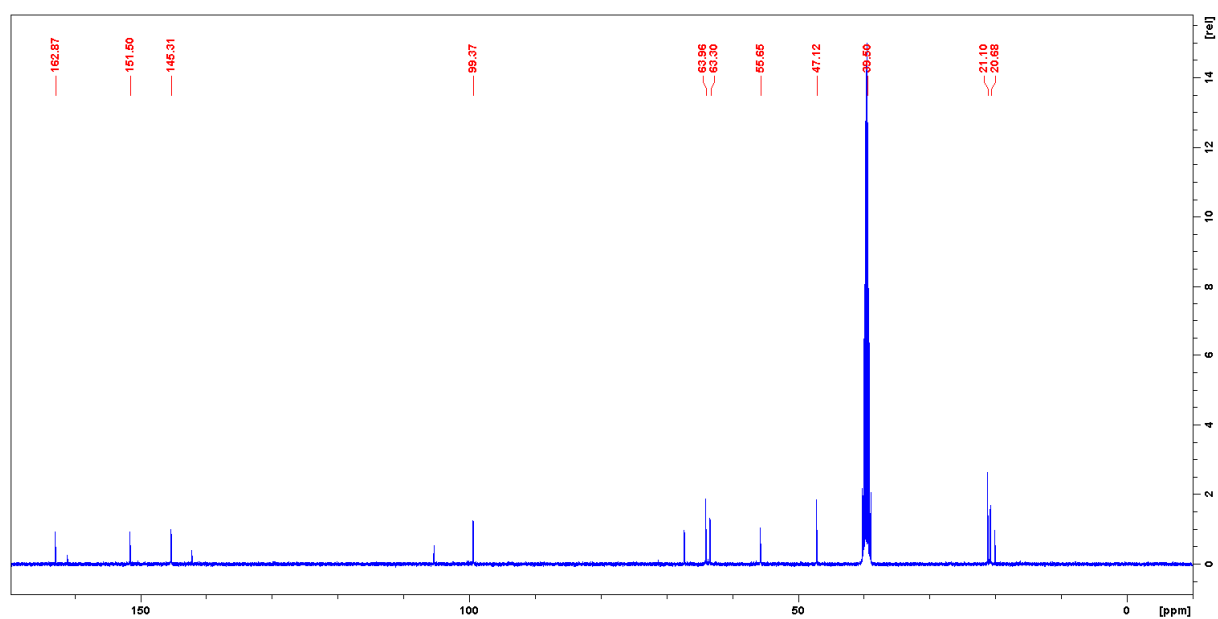



## 2-methyl-2,3-dihydro-[1,3]oxazolo[3,2-a]pyrimidin-7-one (**18**)

Figure S31. HPLC-MS data of **18**

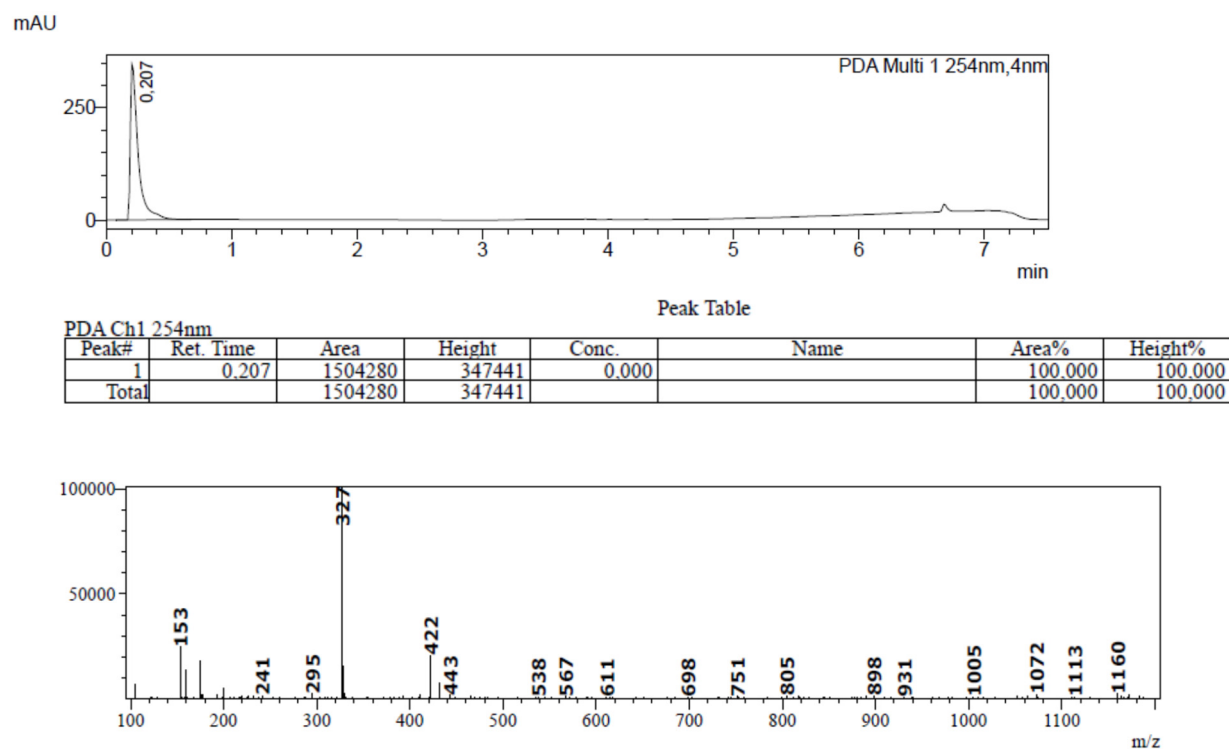

Figure S32.  $^1\text{H}$  NMR spectrum of **18**

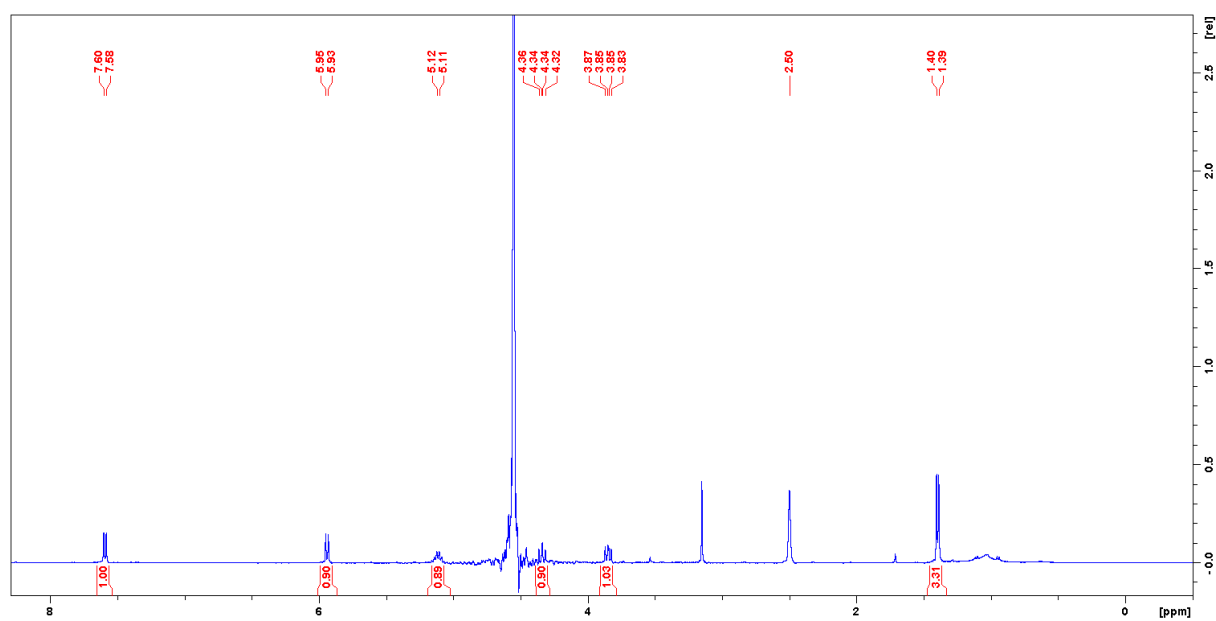

Figure S33.  $^{13}\text{C}$  NMR spectrum of **18**

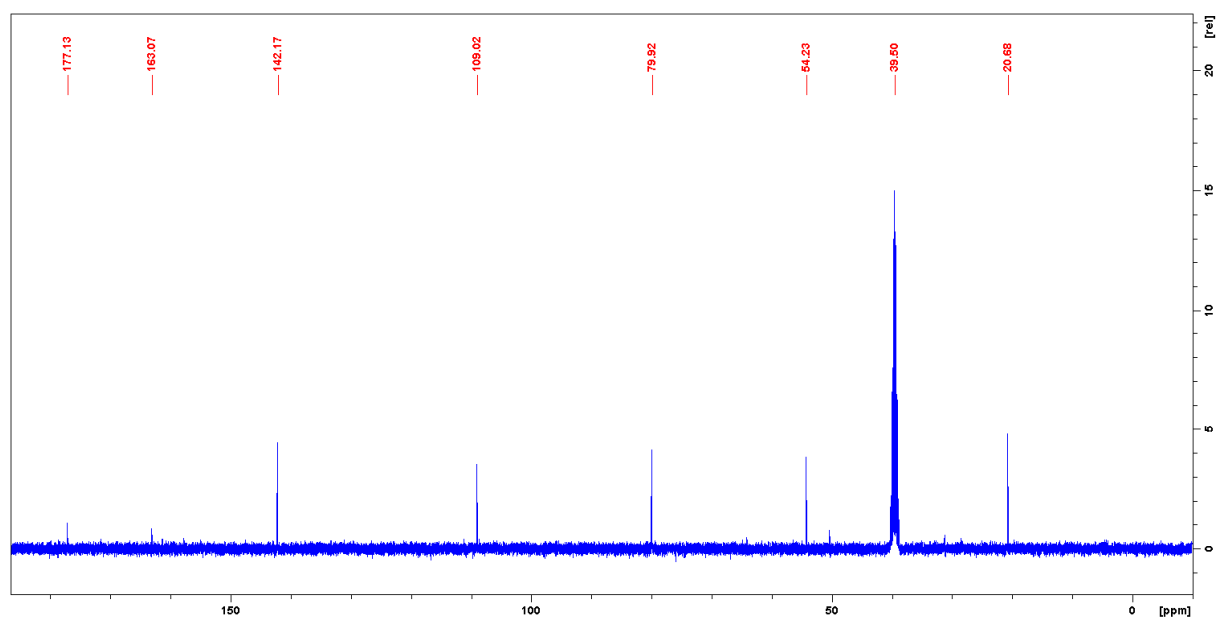

## 2-methyl-2,3-dihydro-[1,3]thiazolo[3,2-a]pyrimidin-7-one (**19**)

Figure S34. HPLC-MS data of **19**

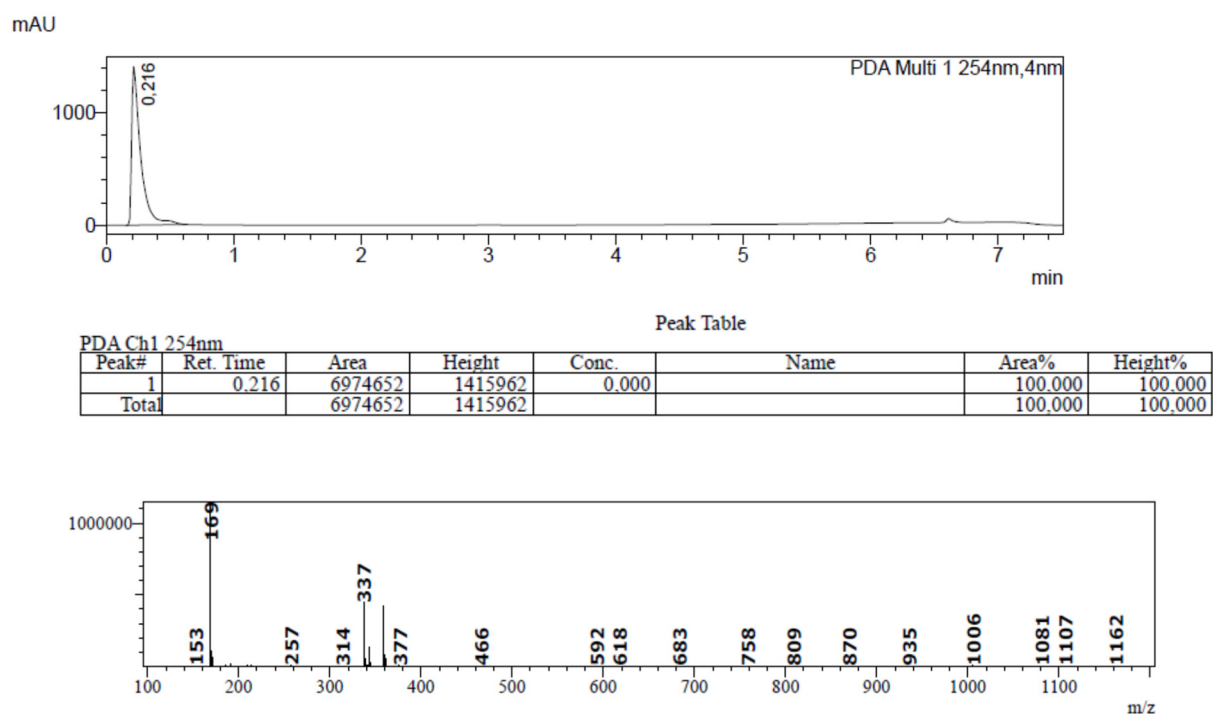

Figure S35.  $^1\text{H}$  NMR spectrum of **19**

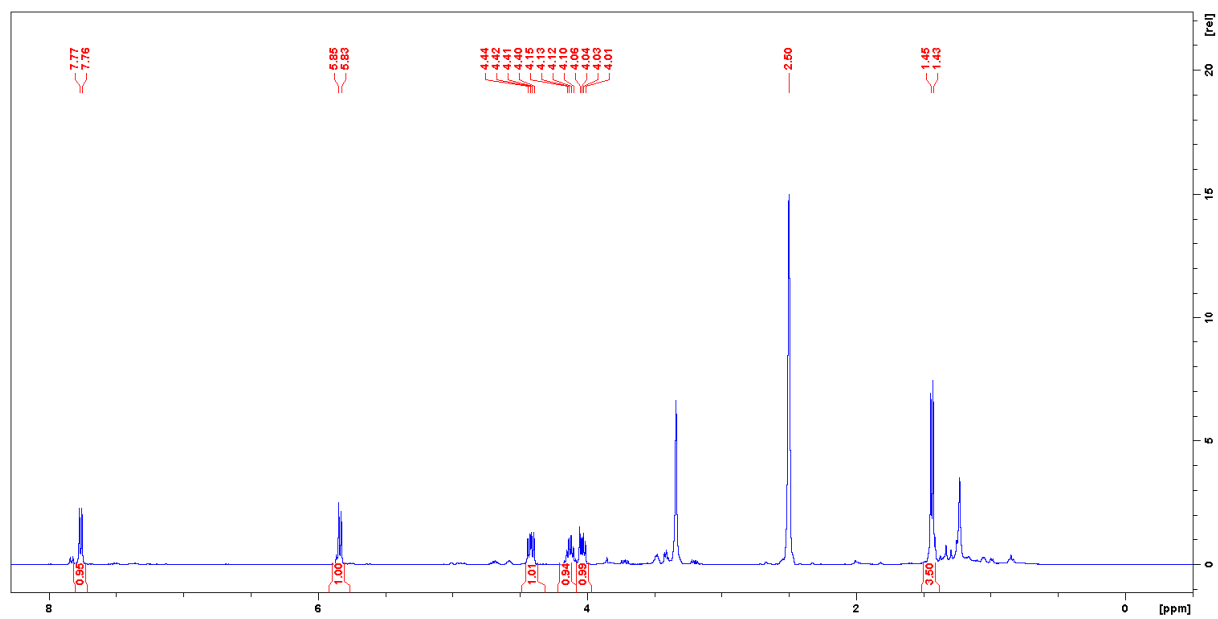

Figure S36. <sup>13</sup>C NMR spectrum of **19**

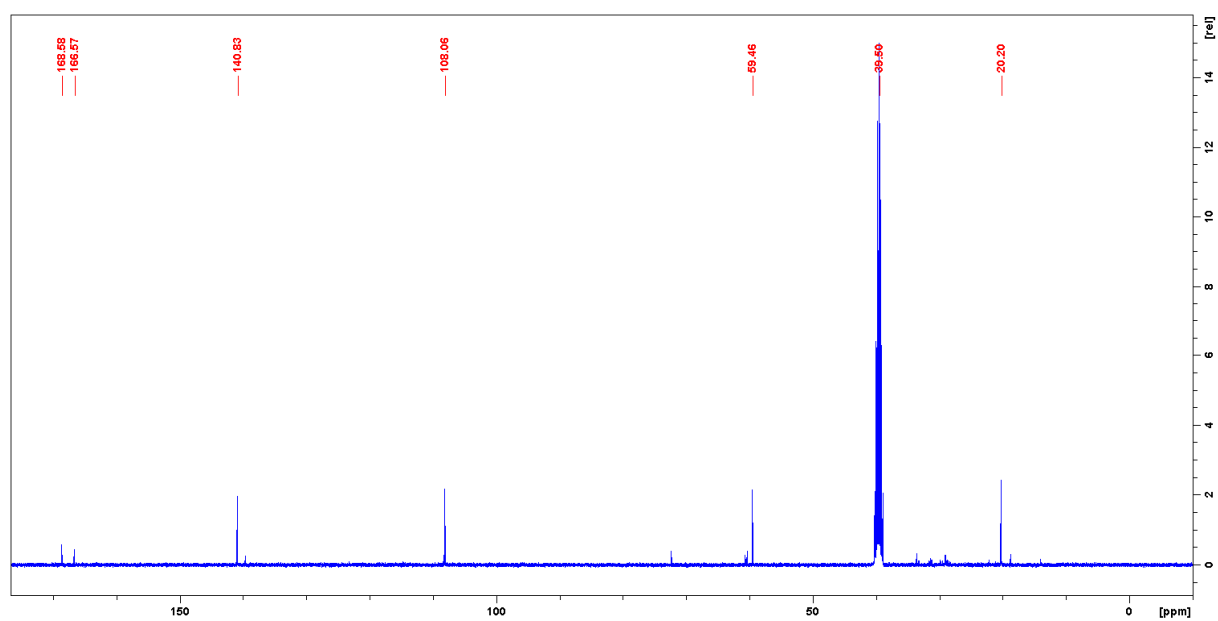

## Theoretical calculations

The Jaguar pKa prediction module calculates the pKa (or pKb) of molecules that contain acidic or basic functional groups (Table S9). The calculations involve geometry optimization of the ionic and neutral species, single point en. and frequency calculations, and an empirical correction. The conformational searches were completed with Schrödinger's MacroModel package. The Jaguar pKa module completes the geometry optimization on a DFT (density function theory) level with B3KYP basis set with implicit (water) solvation model6 [14, 15, 16].

### MacroModel

Schrödinger Release 2022-1: MacroModel, Schrödinger, LLC, New York, NY, 2021.

### Jaguar pKa

Schrödinger Release 2022-1: Jaguar pKa, Schrödinger, LLC, New York, NY, 2021.

**Table S9.** Schrödinger Jaguar pKa calculations based on the lowest energy conformer (external conformational search)

| Structures                                                                                                                         | lowest en. protonated conformer                                                 | lowest en. deprotonated conformer                                               |
|------------------------------------------------------------------------------------------------------------------------------------|---------------------------------------------------------------------------------|---------------------------------------------------------------------------------|
| 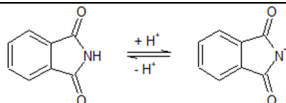 <p>phthalazine pKa = 8.63 (8.63*)</p>          | <p>gas phase en.: -513.117847<br/>sol phase en.: -513.138044<br/>(hartrees)</p> | <p>gas phase en.: -512.560480<br/>sol phase en.: -512.668156<br/>(hartrees)</p> |
|  <p>isatin pKa = 9.70 (9.72*)</p>               | <p>gas phase en.: -513.082193<br/>sol phase en.: -513.104077<br/>(hartrees)</p> | <p>gas phase en.: -512.527494<br/>sol phase en.: -512.630304<br/>(hartrees)</p> |
|  <p>phthalazynone pKa = 11.89 (11.89*)</p>      | <p>gas phase en.: -493.209912<br/>sol phase en.: -493.227139<br/>(hartrees)</p> | <p>gas phase en.: -492.635548<br/>sol phase en.: -492.748877<br/>(hartrees)</p> |
|  <p>pyrimidone pKa = 8.40 (8.42*)</p>           | <p>gas phase en.: -339.579975<br/>sol phase en.: -339.022864<br/>(hartrees)</p> | <p>gas phase en.: -339.601320<br/>sol phase en.: -339.134750<br/>(hartrees)</p> |
|  <p>pyrimidone2 pKa = 7.91 (7.96*)</p>          | <p>gas phase en.: -339.555634<br/>sol phase en.: -339.584831<br/>(hartrees)</p> | <p>gas phase en.: -339.008534<br/>sol phase en.: -339.116348<br/>(hartrees)</p> |
|  <p>6-methyluracil (H11) pKa = 9.34 (9.45*)</p> | <p>gas phase en.: -454.168677<br/>sol phase en.: -454.198229<br/>(hartrees)</p> | <p>gas phase en.: -453.598637<br/>sol phase en.: -453.726849<br/>(hartrees)</p> |
|  <p>6-methyluracil (H10) pKa = 9.44 (9.45*)</p> | <p>gas phase en.: -454.160682<br/>sol phase en.: -454.186964<br/>(hartrees)</p> | <p>gas phase en.: -453.607240<br/>sol phase en.: -453.715793<br/>(hartrees)</p> |
|  <p>benzotriazole pKa = 8.00 (7.95*)</p>        | <p>gas phase en.: -395.880371<br/>sol phase en.: -395.895304<br/>(hartrees)</p> | <p>gas phase en.: -395.323155<br/>sol phase en.: -395.429454<br/>(hartrees)</p> |
|  <p>benzotriazole2 pKa = 6.39 (6.38*)</p>       | <p>gas phase en.: -395.881957<br/>sol phase en.: -395.896580<br/>(hartrees)</p> | <p>gas phase en.: -395.324863<br/>sol phase en.: -395.431846<br/>(hartrees)</p> |

|                                                                                                                                             |                                                                                 |                                                                                 |
|---------------------------------------------------------------------------------------------------------------------------------------------|---------------------------------------------------------------------------------|---------------------------------------------------------------------------------|
| 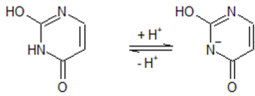 <p>uracil <math>pK_a = 8.06</math> (8.06*)</p>            | <p>gas phase en.: -414.823452<br/>sol phase en.: -414.848088<br/>(hartrees)</p> | <p>gas phase en.: -414.269009<br/>sol phase en.: -414.384350<br/>(hartrees)</p> |
|  <p>uracil2 <math>pK_a</math> (H9) = 9.13 (9.11*)</p>      | <p>gas phase en.: -414.842691<br/>sol phase en.: -414.872028<br/>(hartrees)</p> | <p>gas phase en.: -414.274873<br/>sol phase en.: -414.401717<br/>(hartrees)</p> |
|  <p>uracil2 <math>pK_a</math> (H12) = 8.99 (9.05*)</p>     | <p>gas phase en.: -414.834944<br/>sol phase en.: -414.861277<br/>(hartrees)</p> | <p>gas phase en.: -414.284165<br/>sol phase en.: -414.391998<br/>(hartrees)</p> |
|  <p>thiouracil <math>pK_a = 7.28</math> (7.23*)</p>        | <p>gas phase en.: -737.770685<br/>sol phase en.: -737.789703<br/>(hartrees)</p> | <p>gas phase en.: -737.223094<br/>sol phase en.: -737.326648<br/>(hartrees)</p> |
|  <p>thiouracil2 <math>pK_a</math> (H9) = 7.14 (7.15*)</p>  | <p>gas phase en.: -737.790006<br/>sol phase en.: -737.814698<br/>(hartrees)</p> | <p>gas phase en.: -737.814698<br/>sol phase en.: -737.350178<br/>(hartrees)</p> |
|  <p>thiouracil2 <math>pK_a</math> (H12) = 6.53 (6.54*)</p> | <p>gas phase en.: -737.782590<br/>sol phase en.: -737.240363<br/>(hartrees)</p> | <p>gas phase en.: -737.804492<br/>sol phase en.: -737.340535<br/>(hartrees)</p> |
|  <p>compound 15 <math>pK_a = 8.81</math></p>              | <p>gas phase en.: -647.324351<br/>sol phase en.: -647.350320<br/>(hartrees)</p> | <p>gas phase en.: -646.780623<br/>sol phase en.: -646.880322<br/>(hartrees)</p> |
|  <p>compound 18 <math>pK_a = 8.13</math></p>             | <p>gas phase en.: -608.005898<br/>sol phase en.: -608.034294<br/>(hartrees)</p> | <p>gas phase en.: -607.449338<br/>sol phase en.: -607.565729<br/>(hartrees)</p> |

\* these values were obtained with the jaguar pKa generated conformers

## Discussion

For the elucidation of the results obtained, theoretical calculations were carried out and pKa values were determined for compounds **1–7**. [32–34] In the case of **1–3**, there is only a single protic hydrogen in the molecules, attached to the nitrogen atom with calculated pKa values of 8.63, 9.70 and 11.89, respectively. These data indicate that under alkaline conditions, protons can be removed and the formed anions as nucleophiles are capable of opening PC providing the *N*-alkylated product. Considering compound **4**, there is only single NH in the molecule with a protic nature, but both nitrogen atoms can carry protic hydrogens. As a consequence, two products are expected. The pKa values calculated are 7.91 and 8.40 for 1*N* and 3*N*, respectively, indicating that hydrogen in the 1*N* position is more acidic. This corroborates our experimental results, since the 1*N*-alkylated product was formed in higher amount. Importantly, no doubly-alkylated product was observed. As regards compound **5**, each nitrogen atom bears a hydrogen of protic nature, thus double alkylation might be expected. The pKa values calculated are 9.44 and 9.34 for 1*N* and 3*N*, respectively. According to these data, the first alkylation may takes place in position 3. The pKa value calculated for the 3*N*-alkylated derivative of **5** is 8.81. Accordingly, the alkylation of **5** in position 3 enhanced the acidity of position 1 and this explains why the doubly-alkylated product was isolated as the sole derivative. Concerning compound **6**, there is only a single hydrogen of protic character in the molecule. However, the anion formed after deprotonation has two isomeric forms with the negative charge located at either in position 1 or position 2. Theoretical calculations suggest that the latter isomeric form is slightly more stable (~1 kcal/mol), but charge transition is possible, due to the low energy difference between the two isomeric forms. Finally, for compound **7**, results may be expected to be similar to those of **5**. The pKa values calculated are 6.54 and 7.15 for 1*N* and 3*N*, respectively. Both protons have significant acidic nature, that is, doubly alkylation observed is in harmony with theoretical calculations (Table S9).
